# Supplementary material for: The 22q11 low copy repeats are characterized by unprecedented size and structural variability
Source: PubMed Central journal article supplement — Genome Res. 2019 Sep;29(9):1389–401. doi: 10.1101/gr.248682.119 (PMC6724673; doi:10.1101/gr.248682.119), 2019-09
Supplement: supp_gr.248682.119_Supplemental_FIG_S1.pdf [file supp_gr.248682.119_Supplemental_FIG_S1.pdf]

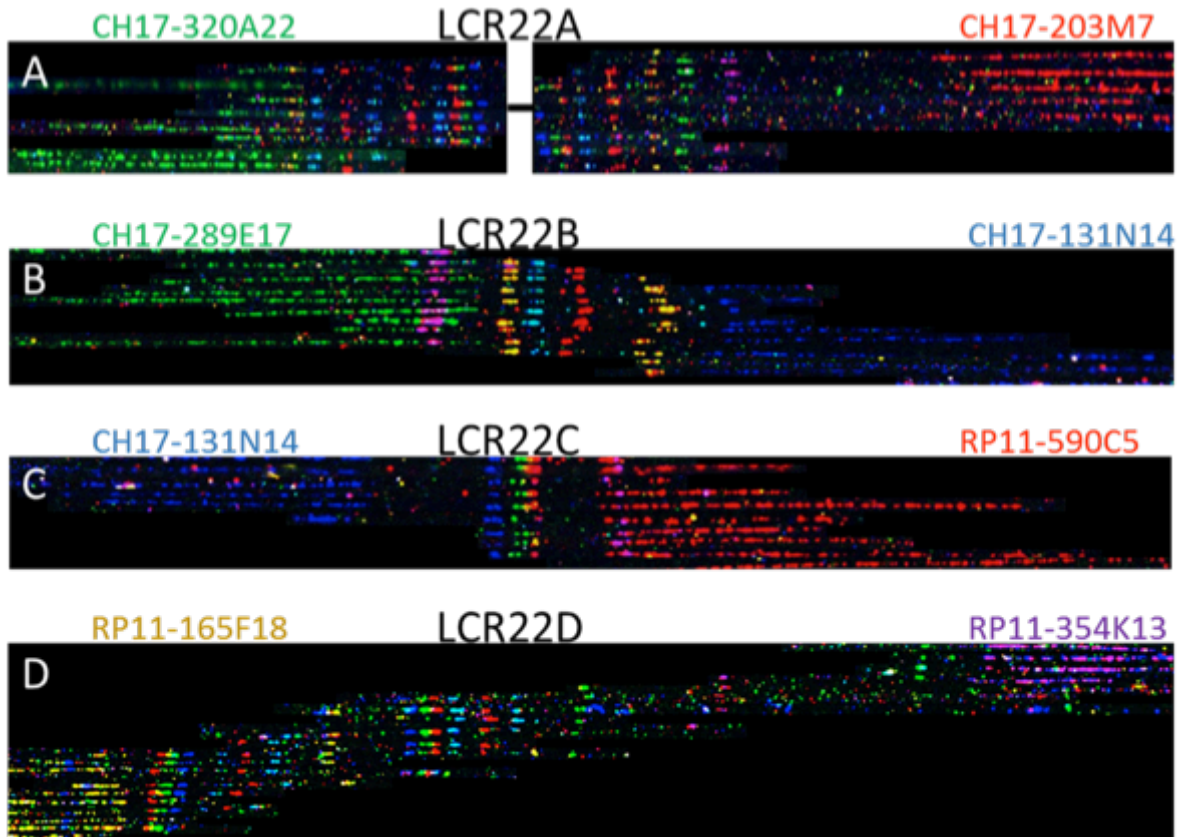

**Fig. S1.**

Location of unique BAC probes flanking LCR22A, -B, -C-, and -D used in fiber FISH to enable identification and directionality of each LCR. A) LCR22A is flanked by CH17-320A22 (green) proximally and CH17-203M7 (red) distally. B) LCR22B's proximal flank is CH17-289E17 (green) and the distal flank is CH17-131N14 (blue). C) LCR22C is nested between CH17-131N14 (blue) and RP11-590C5 (red; distal). D) LCR22D is embedded between RP11-165F18 (yellow; proximal) and RP11-354K13 (magenta; distal).
