# Supplementary material for: The 22q11 low copy repeats are characterized by unprecedented size and structural variability
Source: PubMed Central journal article supplement — Genome Res. 2019 Sep;29(9):1389–401. doi: 10.1101/gr.248682.119 (PMC6724673; doi:10.1101/gr.248682.119), 2019-09
Supplement: supp_gr.248682.119_Supplemental_FIG_S5.pdf [file supp_gr.248682.119_Supplemental_FIG_S5.pdf]

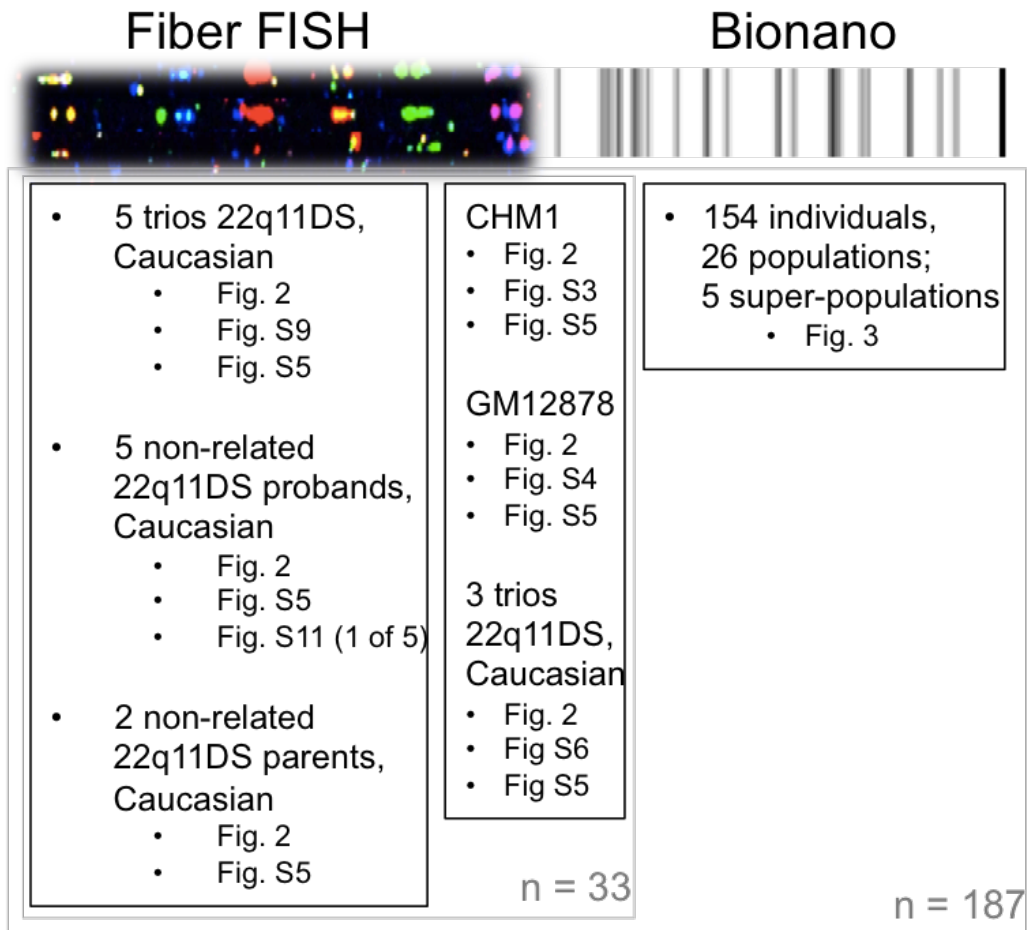

**Fig. S5**

Overview of the 187 human cell lines on which fiber FISH and/or Bionano optical mapping was performed. Fiber FISH mapping was carried out on five trios, five non-related probands, and two non related parents of individuals with the 22q11DS. Bionano optical mapping was performed on a total of 154 individuals from 5 super-populations. Both technologies were aligned in cell lines CHM1, GM12878, and three trios with a proband with the 22q11DS. Figures in which results are discussed are depicted at each cell line subset.
