# Supplementary material for: The 22q11 low copy repeats are characterized by unprecedented size and structural variability
Source: PubMed Central journal article supplement — Genome Res. 2019 Sep;29(9):1389–401. doi: 10.1101/gr.248682.119 (PMC6724673; doi:10.1101/gr.248682.119), 2019-09
Supplement: supp_gr.248682.119_Supplemental_FIG_S6.pdf [file supp_gr.248682.119_Supplemental_FIG_S6.pdf]

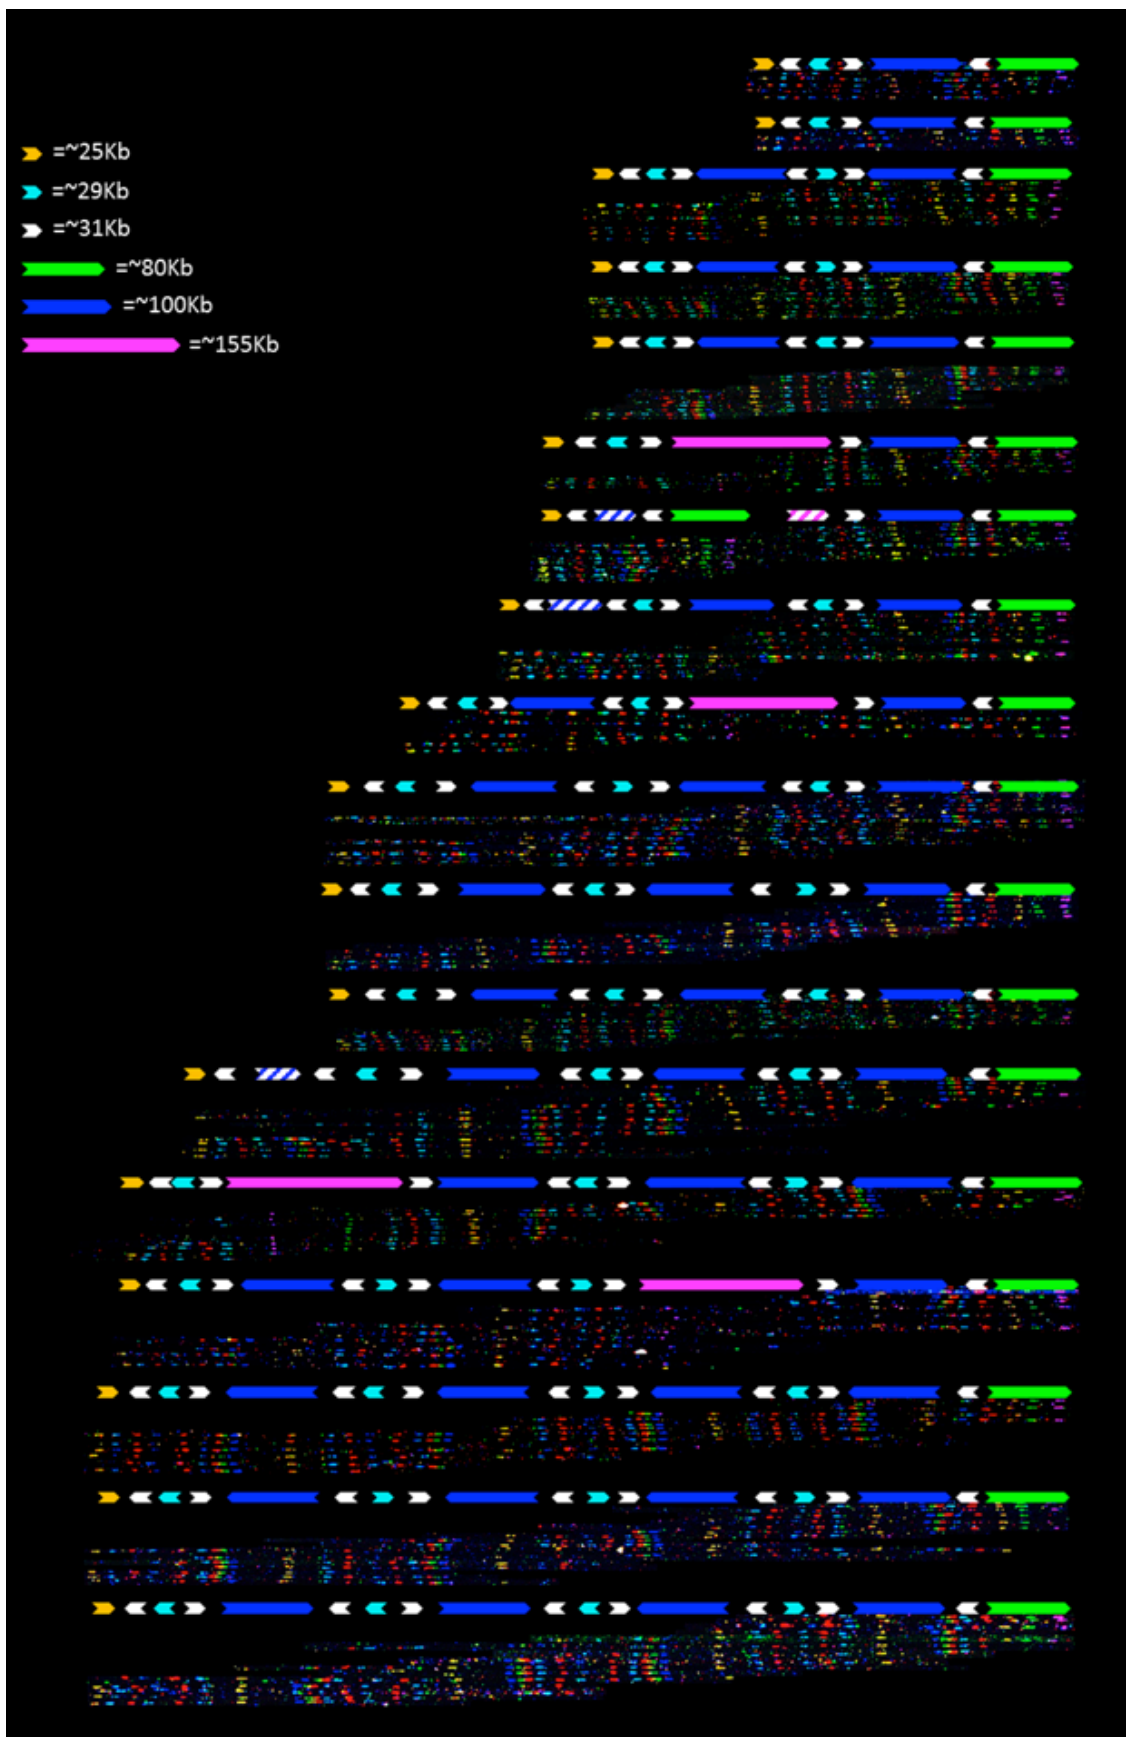

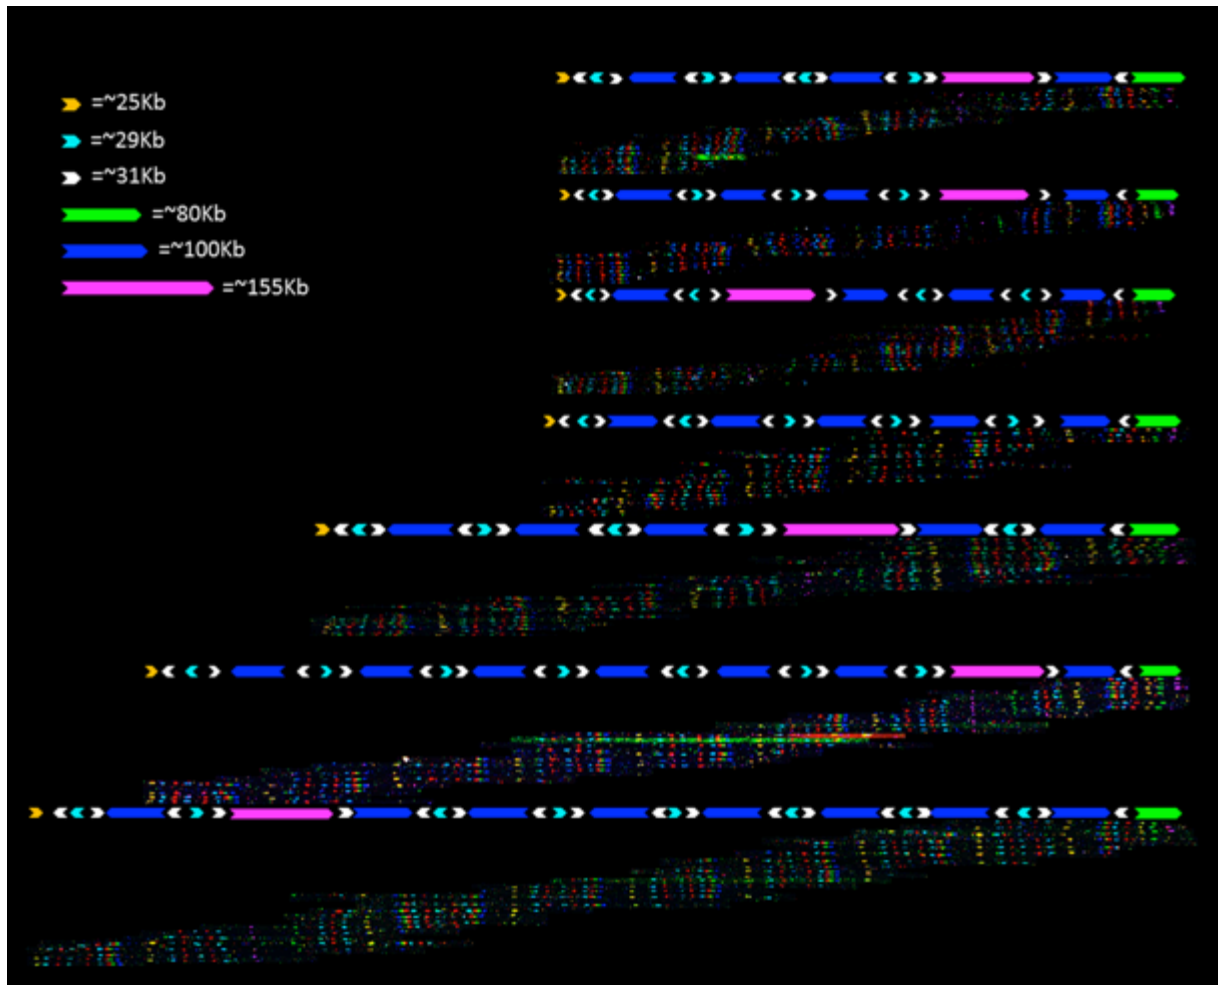

**Fig. S6.**

LCR22A variants detected by fiber FISH. 25 haplotypes observed in 33 cell lines are shown. Haplotypes are aligned to their corresponding duplicon representation. Duplicon size estimates are depicted (upper left).
