# Supplementary material for: The 22q11 low copy repeats are characterized by unprecedented size and structural variability
Source: PubMed Central journal article supplement — Genome Res. 2019 Sep;29(9):1389–401. doi: 10.1101/gr.248682.119 (PMC6724673; doi:10.1101/gr.248682.119), 2019-09
Supplement: supp_gr.248682.119_Supplemental_FIG_S7.pdf [file supp_gr.248682.119_Supplemental_FIG_S7.pdf]

Family 1

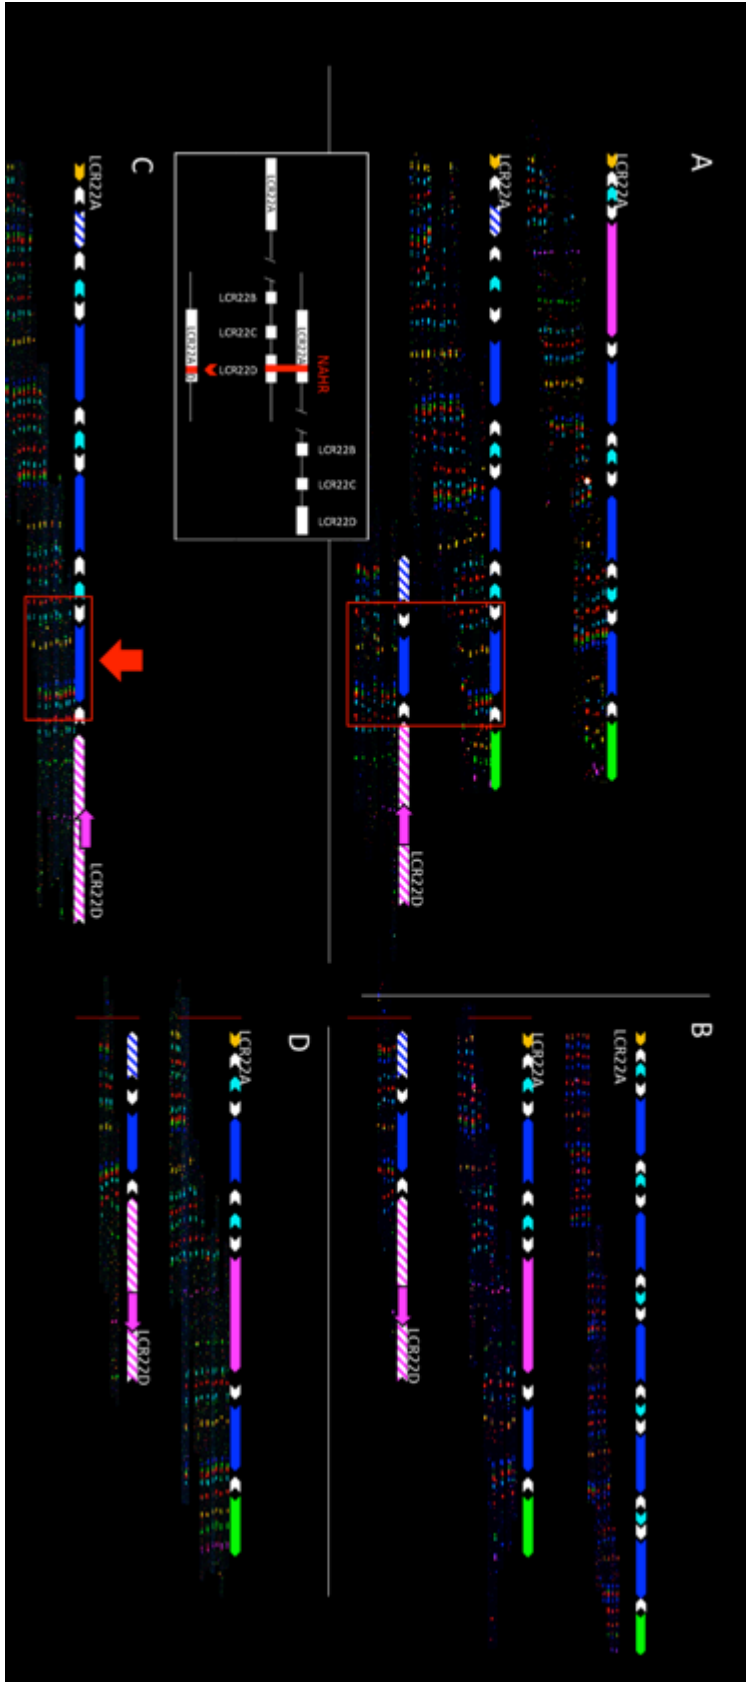

Family 2

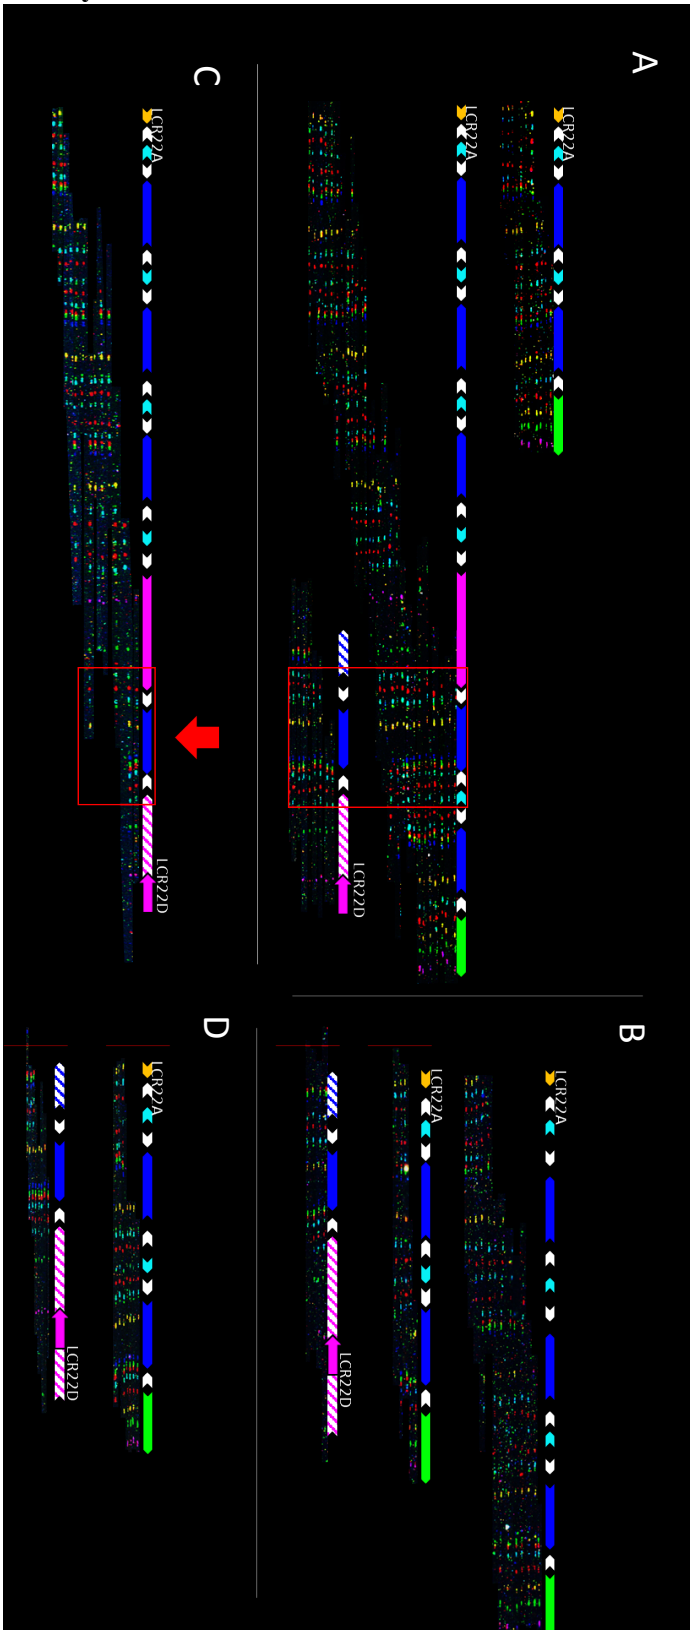

Family 3

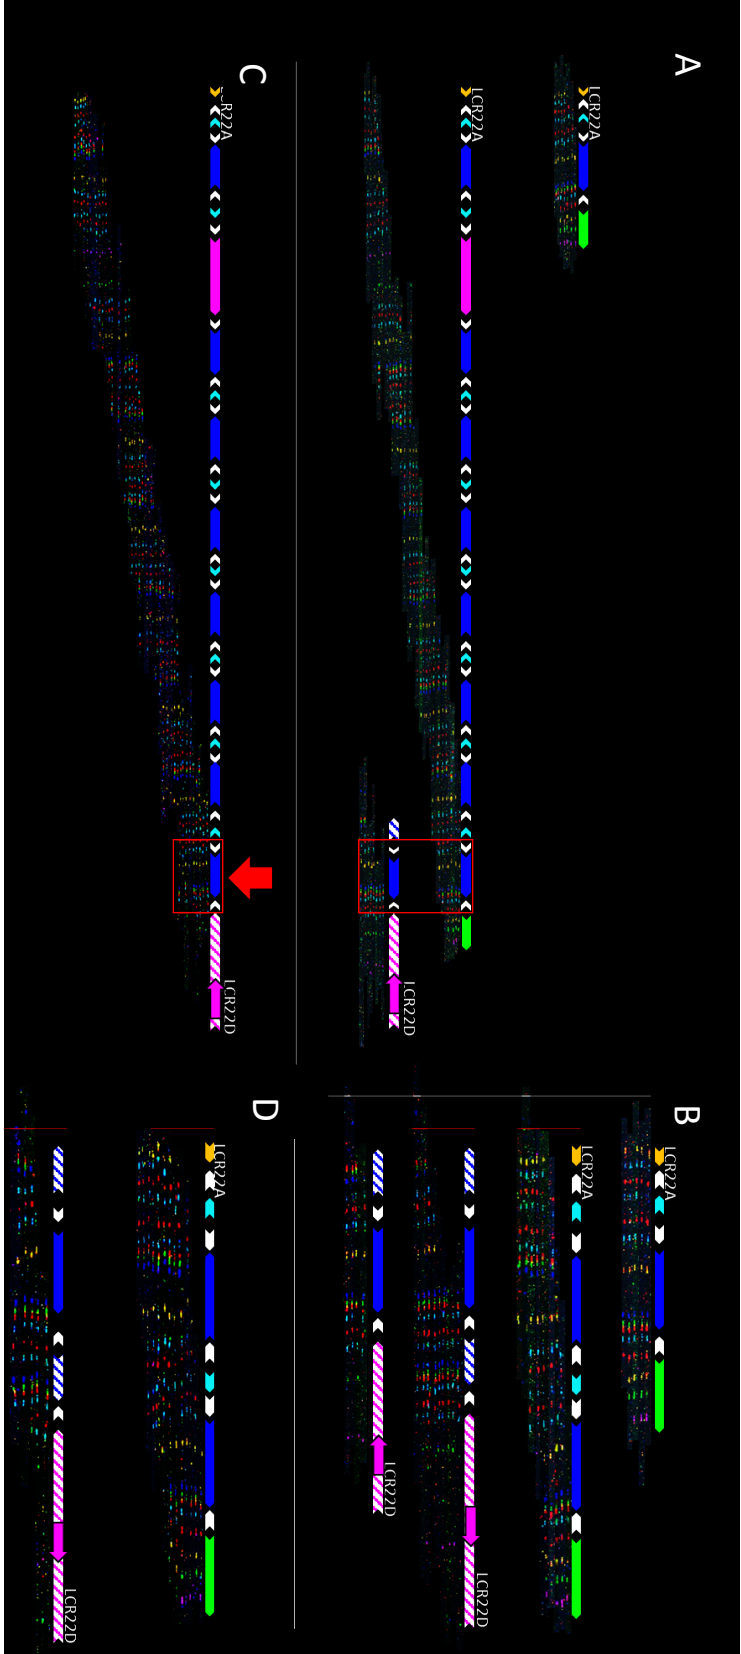

Family 4

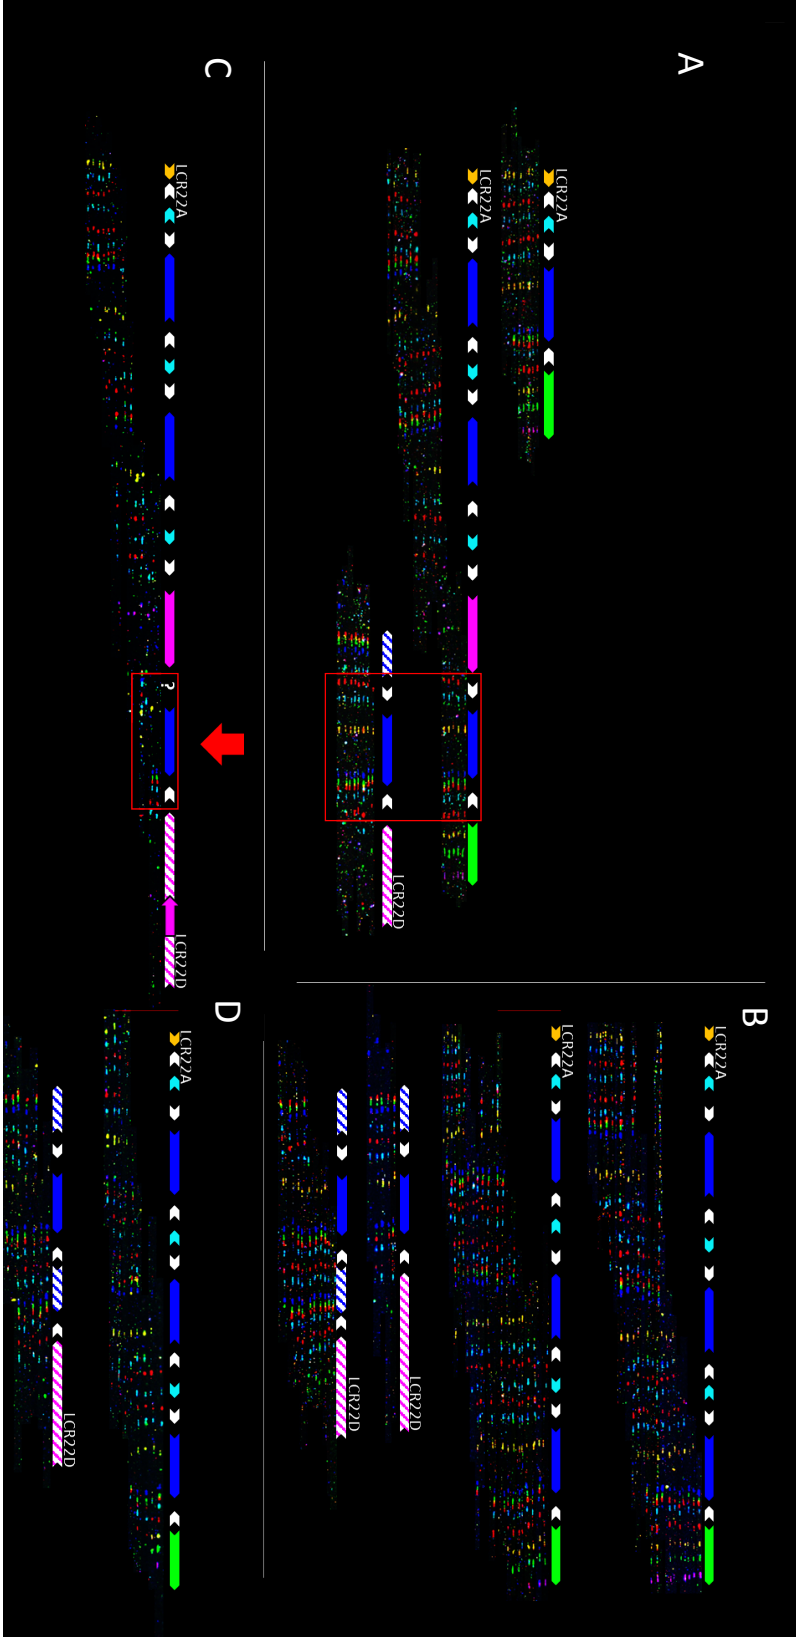

Family 5

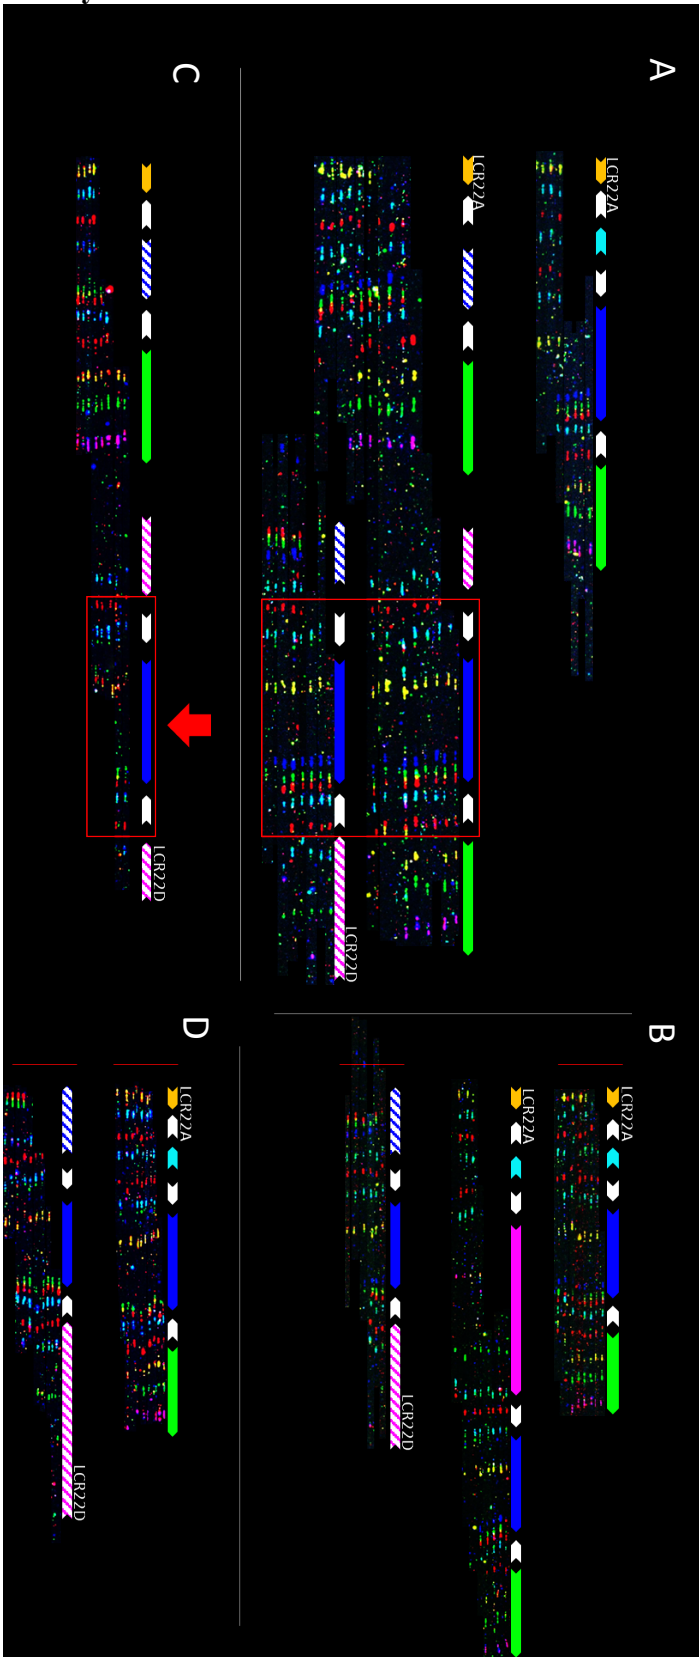

# Family 6

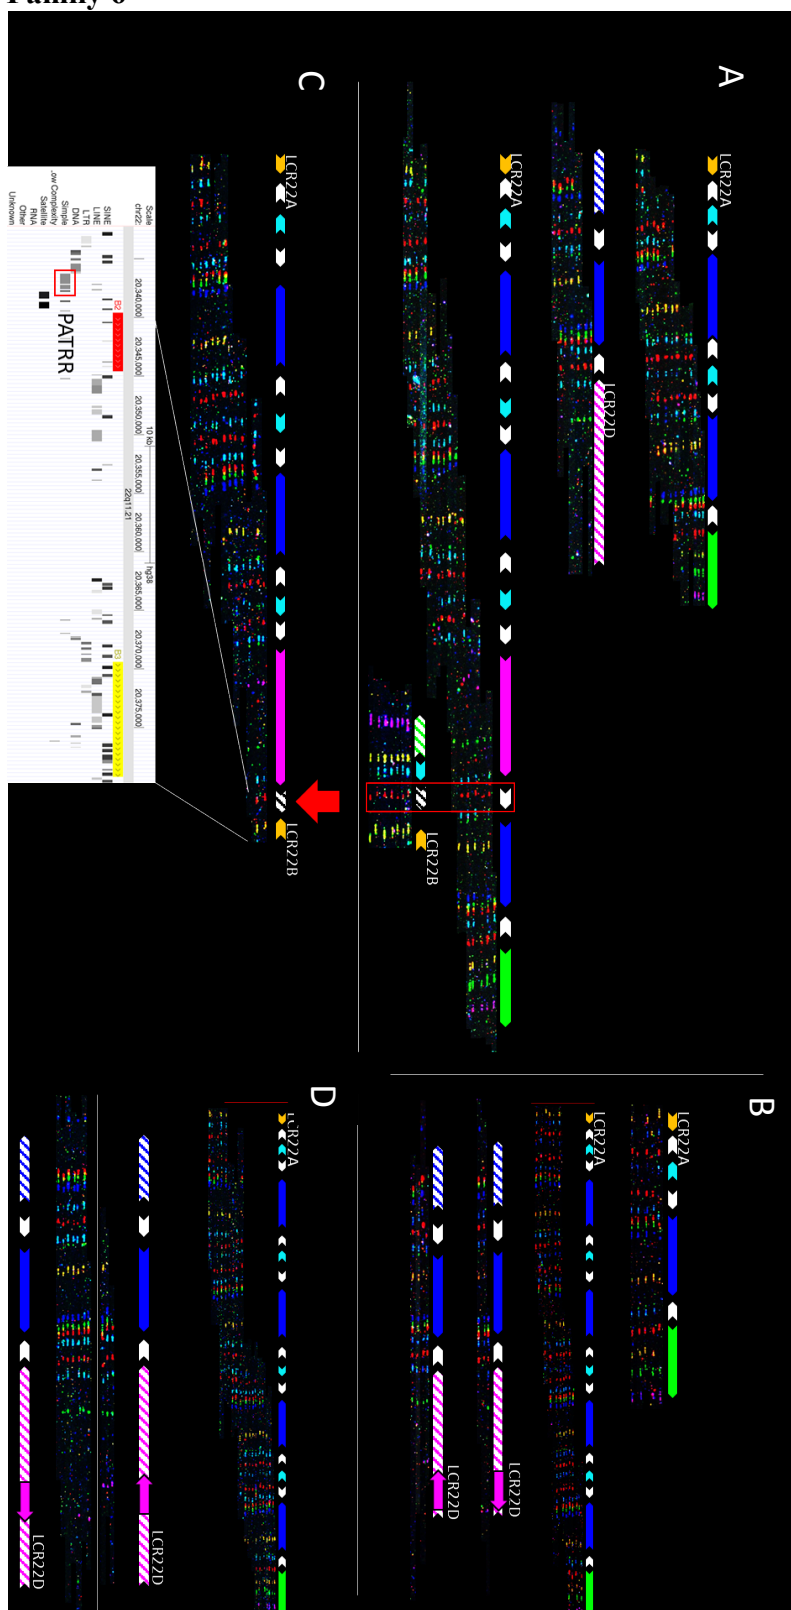

Family 7

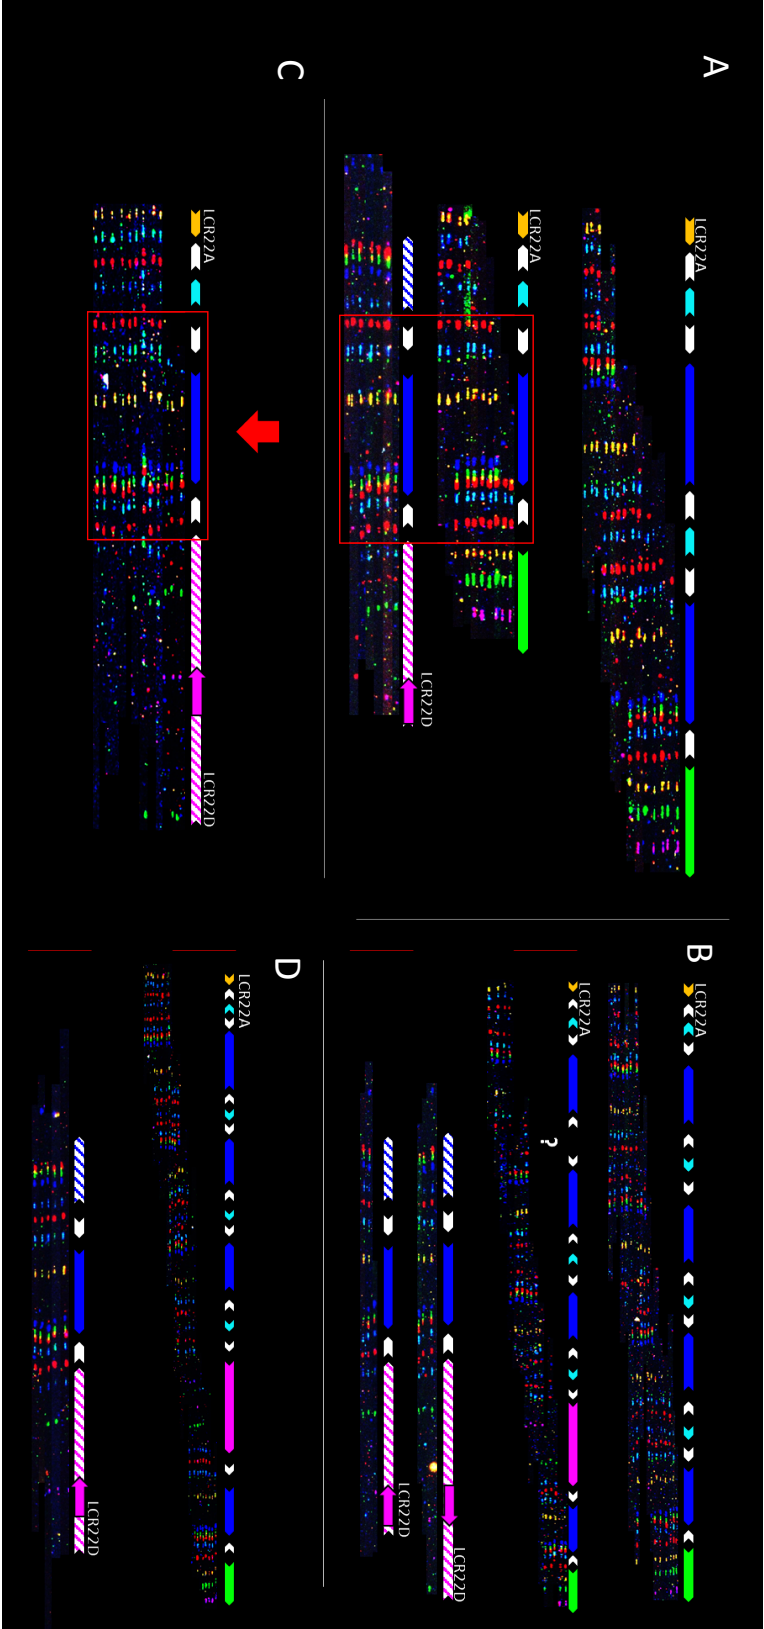

Family 8

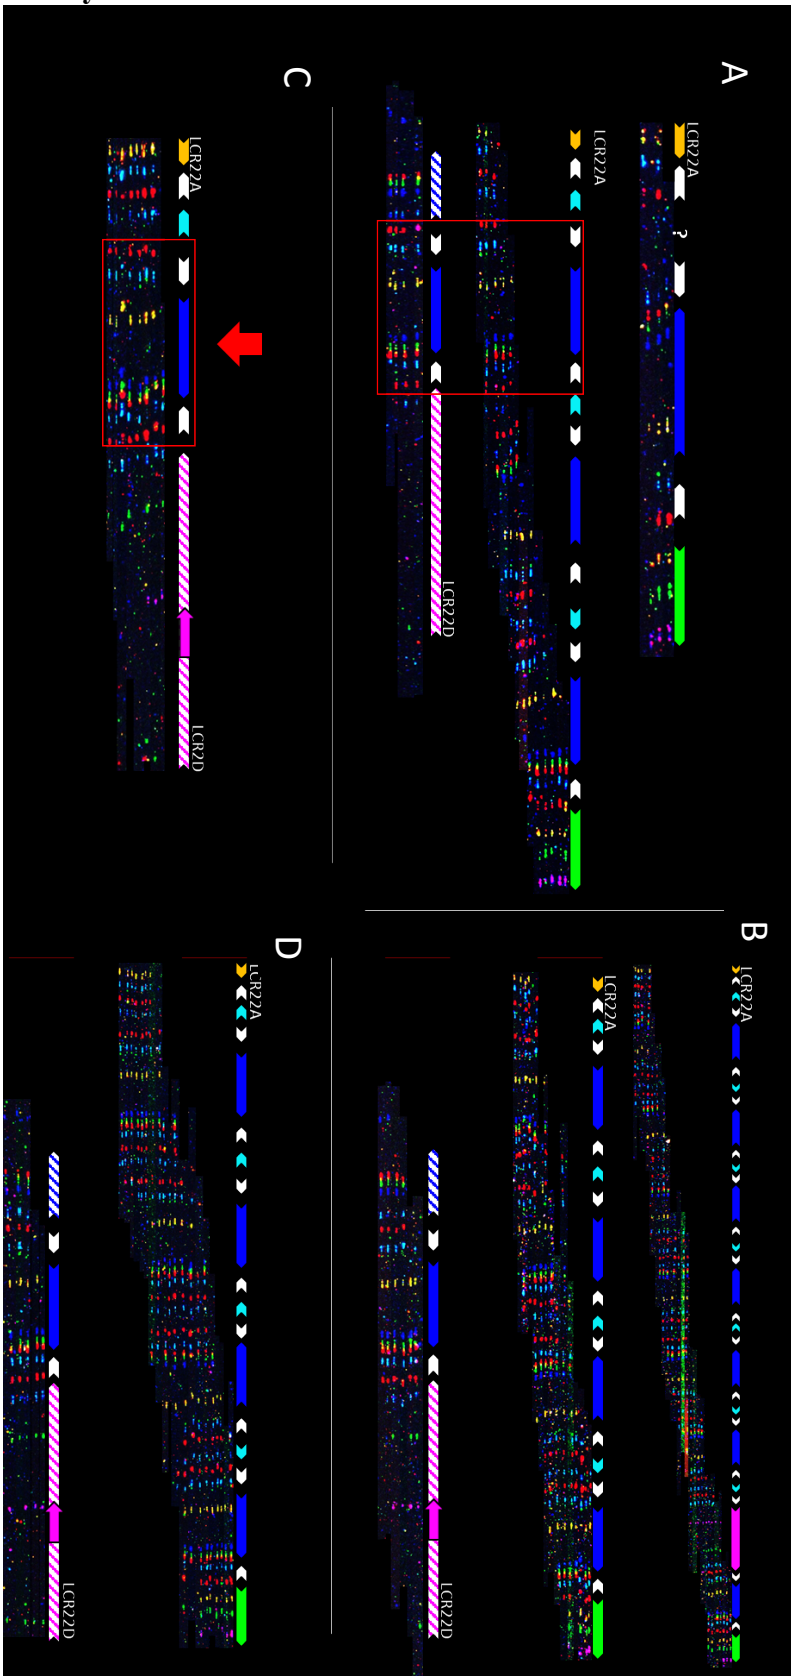



**Fig. S7.**

Analysis of the 22q11.21 deletion in a proband and parents using fiber FISH in eight families. Both alleles of LCR22A and LCR22D (or -B) are shown for each individual in the family trio. A) Parent of origin, B) other parent, C) proband rearranged allele, and D) proband non-rearranged allele. Fiber FISH assemblies are aligned with a duplicon representation as defined in Figure 1. In the parent of origin, the shared region between LCR22A and -D (or -B) is marked by a red box. Below misaligning alleles, the resulting rearranged LCR22 in the proband is displayed. A red arrow marks duplicon(s) that were involved in recombination and define the breakpoint region. The transmission of the un-rearranged allele is depicted on the right. LCR22A and -D alleles of the parent are displayed in the upper-right panel. Transmitted, non-rearranged parental alleles are marked by a red line. The lower right panel shows the non-rearranged alleles observed in the patient.
