# Supplementary material for: The 22q11 low copy repeats are characterized by unprecedented size and structural variability
Source: PubMed Central journal article supplement — Genome Res. 2019 Sep;29(9):1389–401. doi: 10.1101/gr.248682.119 (PMC6724673; doi:10.1101/gr.248682.119), 2019-09
Supplement: supp_gr.248682.119_Supplemental_FIG_S9.pdf [file supp_gr.248682.119_Supplemental_FIG_S9.pdf]

KD77577567 – LCR22A Allele 1 - DLS

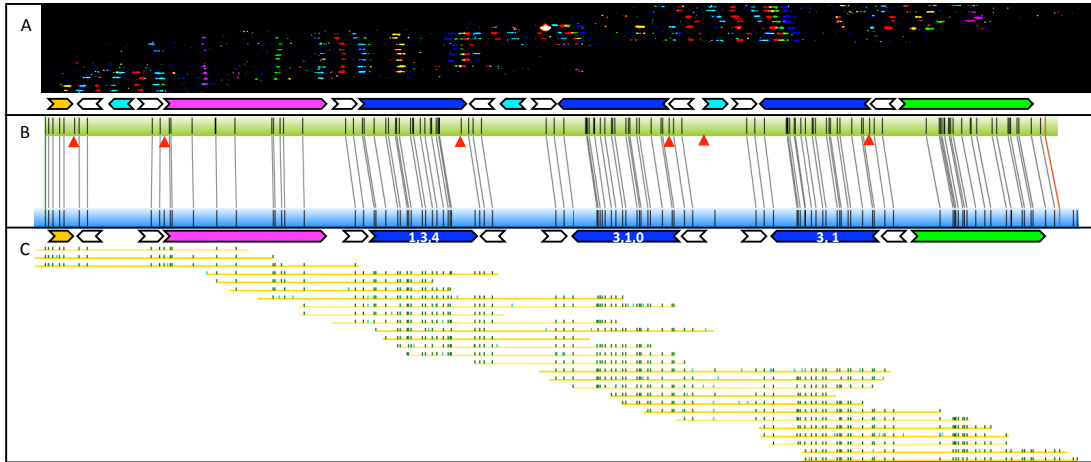

Family 1

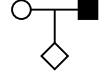

KD77577567 – LCR22A Allele 2 - DLS

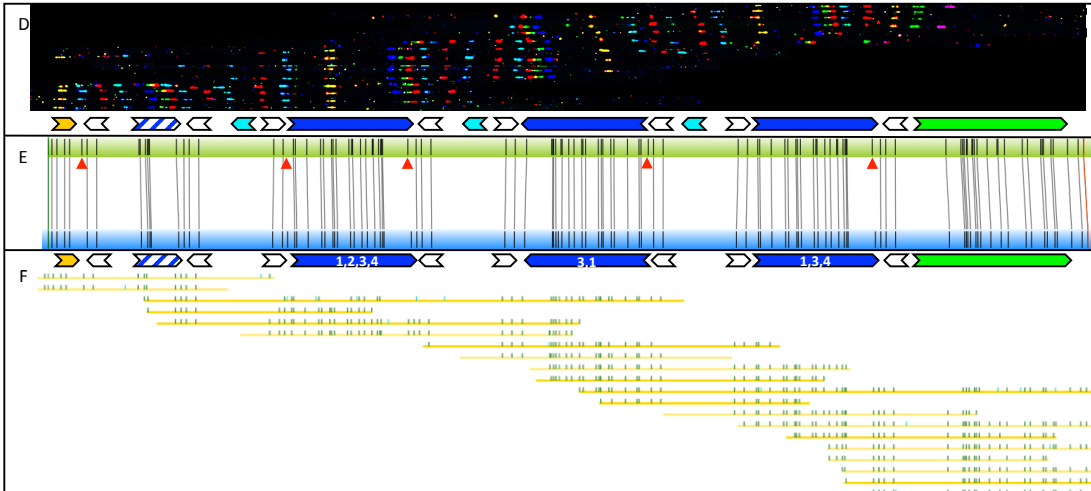

KD70002217 – LCR22A Allele 1 - DLS

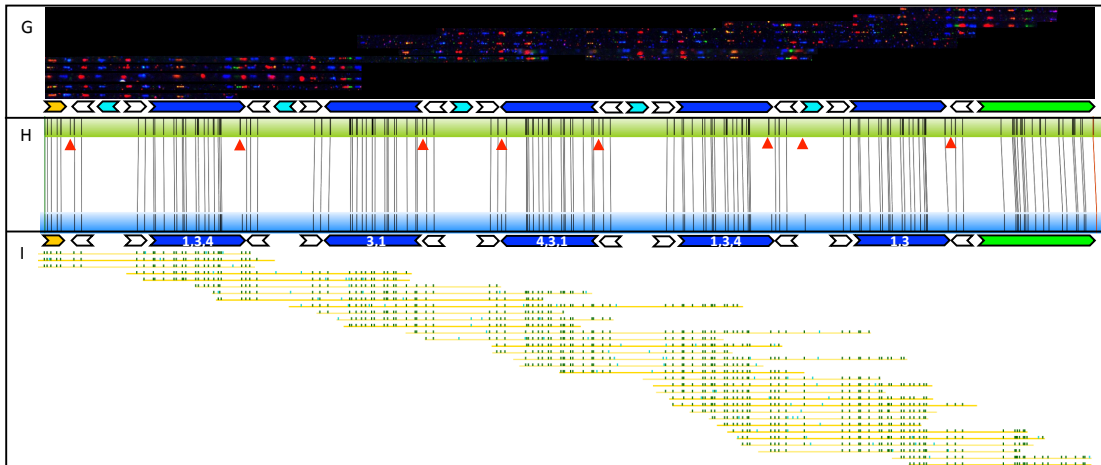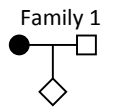

KD70002217 – LCR22A Allele 2 - DLS

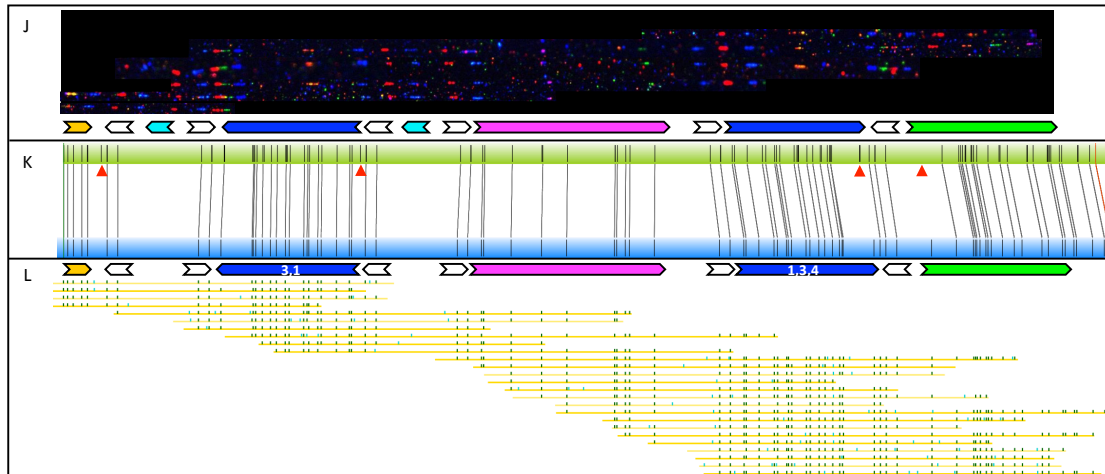

SA85021 – LCR22A Allele 1

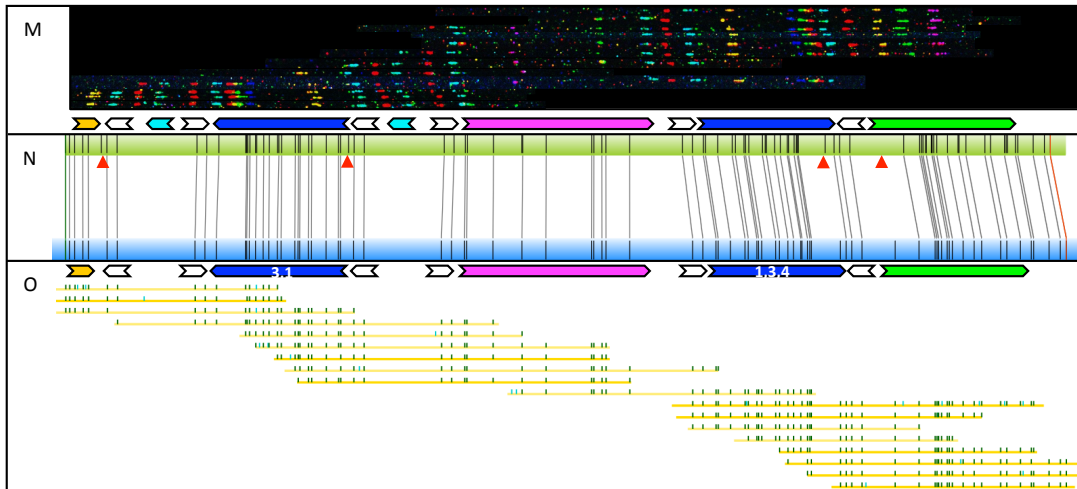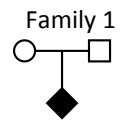

SA85021 – LCR22A/D

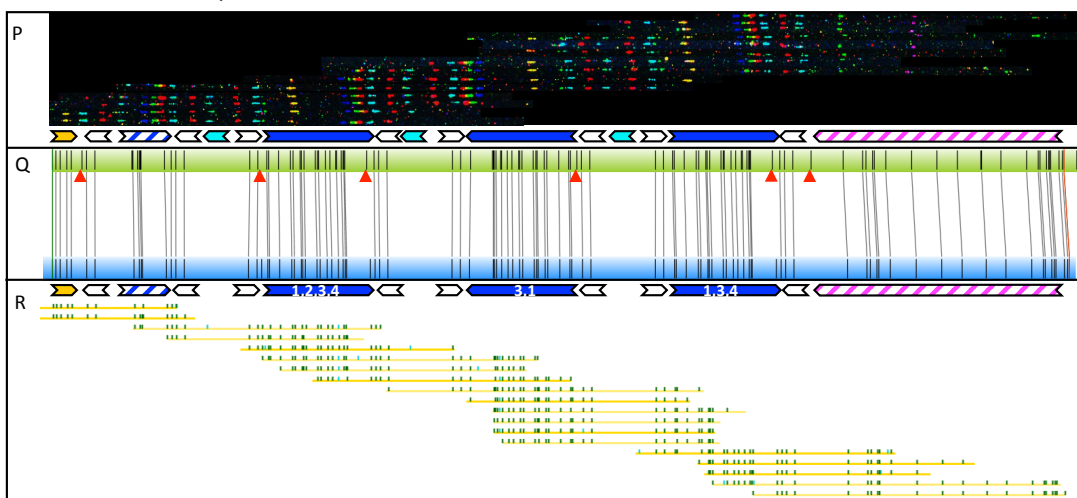

GS61116500 – LCR22A Allele 1 - DLS

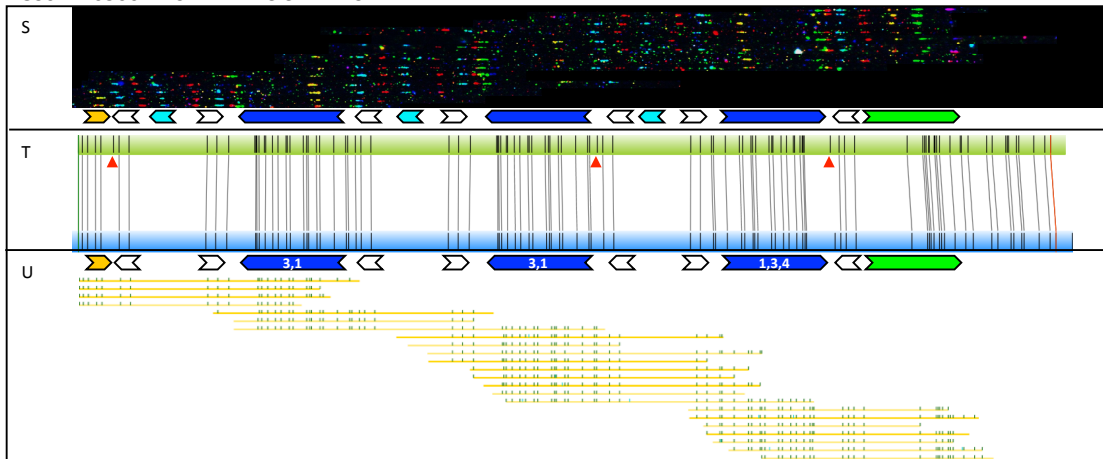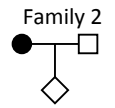

GS61116500 – LCR22A Allele 2 - DLS

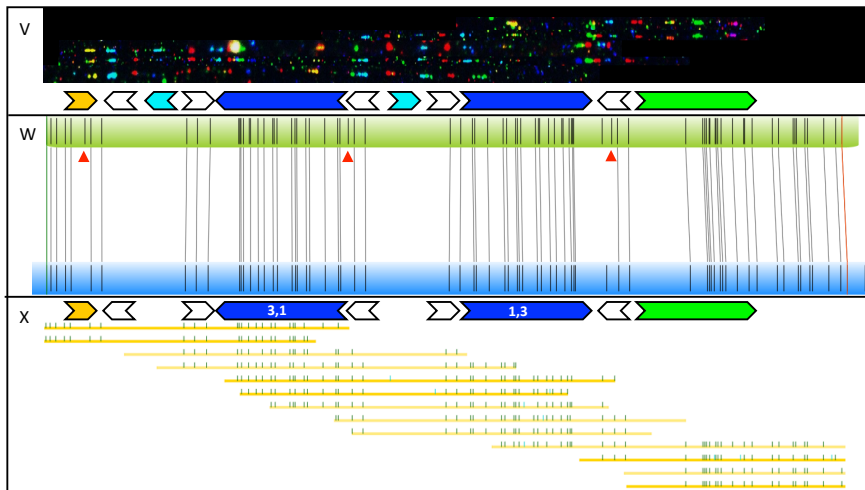

RA61116503 – LCR22A Allele 1 - DLS

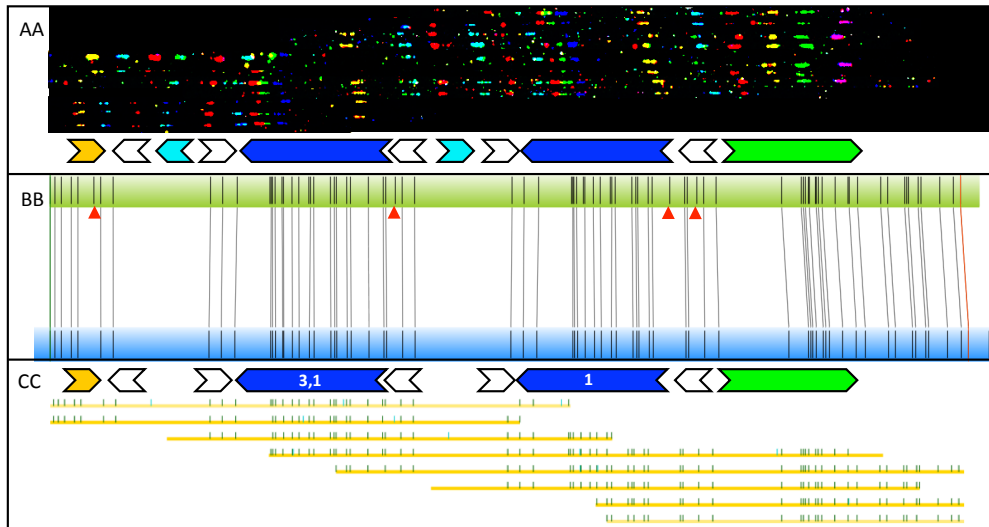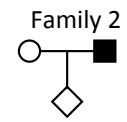

RA61116503 – LCR22A Allele 2 - DLS

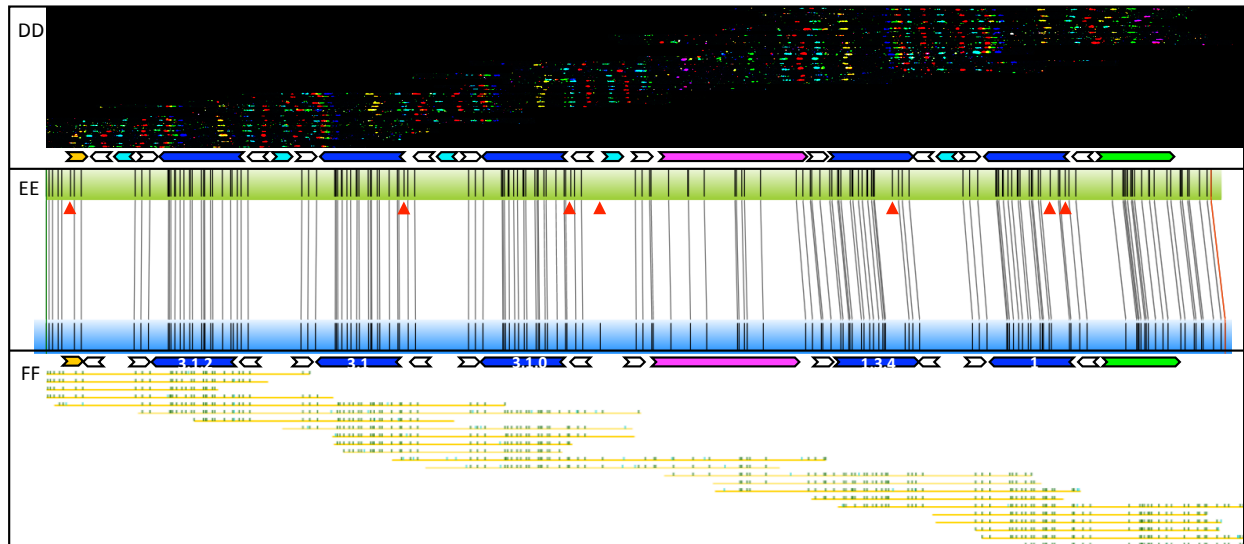

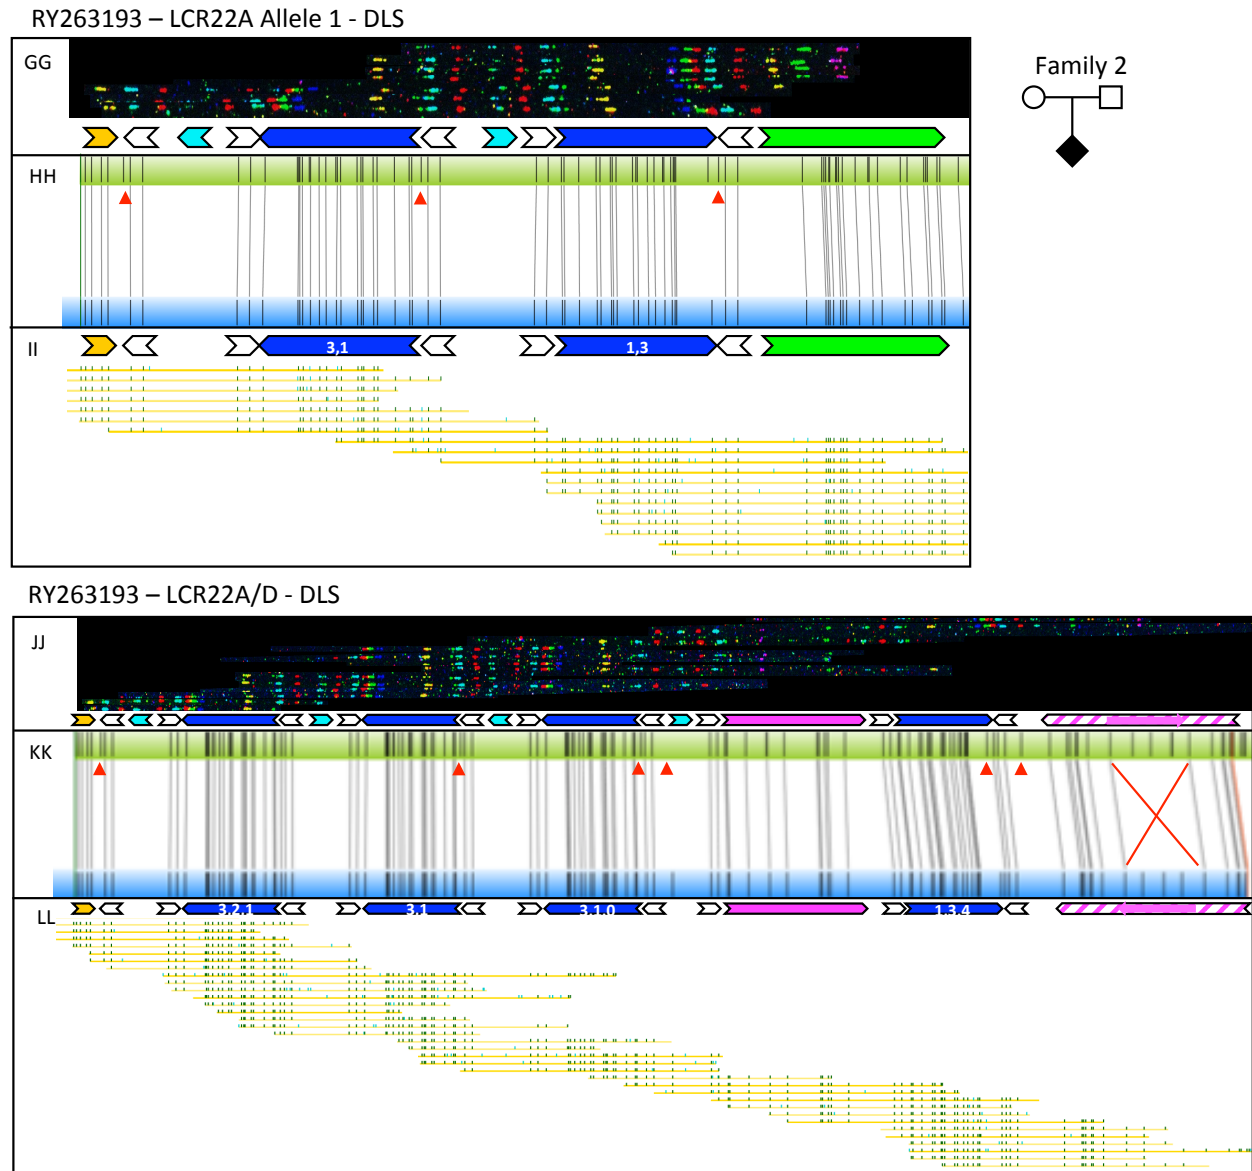

**Fig. S9.**

Overlap of optical map and fiber FISH datasets in Family 1 and 2, two trios with one 22q11DS proband and both parents. Each family is indicated using a pedigree on the top right corner with the family member whose data is presented indicated by a filled circle or square. Both LCR22A alleles for each parent are shown. In the probands, the non-rearranged LCR22A allele and the rearranged LCR22A/D allele are shown. (A,D,G,J,M,P,S,V,AA,DD,GG,JJ) Top: Fiber FISH assembly, Bottom: its decomposition to duplicons as defined in Fig. 1.

(B,E,H,K,N,Q,T,W,BB,EE,HH,KK) Top: predicted optical map generated by *in silico* DLS labeling of hg38 duplicon sequences in the order observed by fiber FISH shown as green bar with black lines (DLS labels); Bottom: observed DLS optical map of the same allele shown as blue bar with black lines (DLS labels). Red arrowheads depict signal discrepancies between predicted and observed maps. (C,F,I,L,O,R,U,X,CC,FF,II,LL) Bottom: Optical map single molecules aligned to the observed LCR22A contig shown as yellow lines with green ticks (DLS

labels); Top: decomposed to duplicons defined as in fig. 1 (top). Observed polymorphic DLS labels as defined in Fig. S6 are indicated by numbers 1-4 inside the duplicons.
