# Supplementary material for: The 22q11 low copy repeats are characterized by unprecedented size and structural variability
Source: PubMed Central journal article supplement — Genome Res. 2019 Sep;29(9):1389–401. doi: 10.1101/gr.248682.119 (PMC6724673; doi:10.1101/gr.248682.119), 2019-09
Supplement: supp_gr.248682.119_Supplemental_FIG_S10.pdf [file supp_gr.248682.119_Supplemental_FIG_S10.pdf]

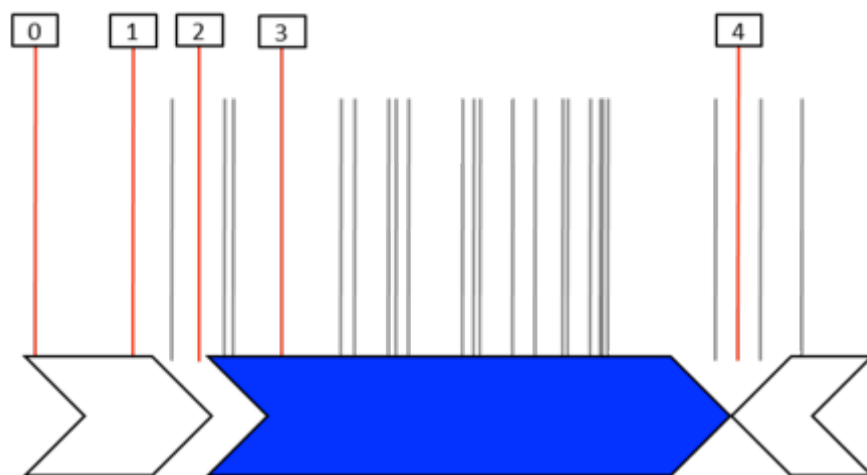

**Fig. S10.**

DLS labels in SD22-4 and SD22-6, with polymorphic labels numbered and highlighted in red. Colored blocks below depict the dupicons in this region.
