# Supplementary material for: The 22q11 low copy repeats are characterized by unprecedented size and structural variability
Source: PubMed Central journal article supplement — Genome Res. 2019 Sep;29(9):1389–401. doi: 10.1101/gr.248682.119 (PMC6724673; doi:10.1101/gr.248682.119), 2019-09
Supplement: supp_gr.248682.119_Supplemental_FIG_S12.pdf [file supp_gr.248682.119_Supplemental_FIG_S12.pdf]

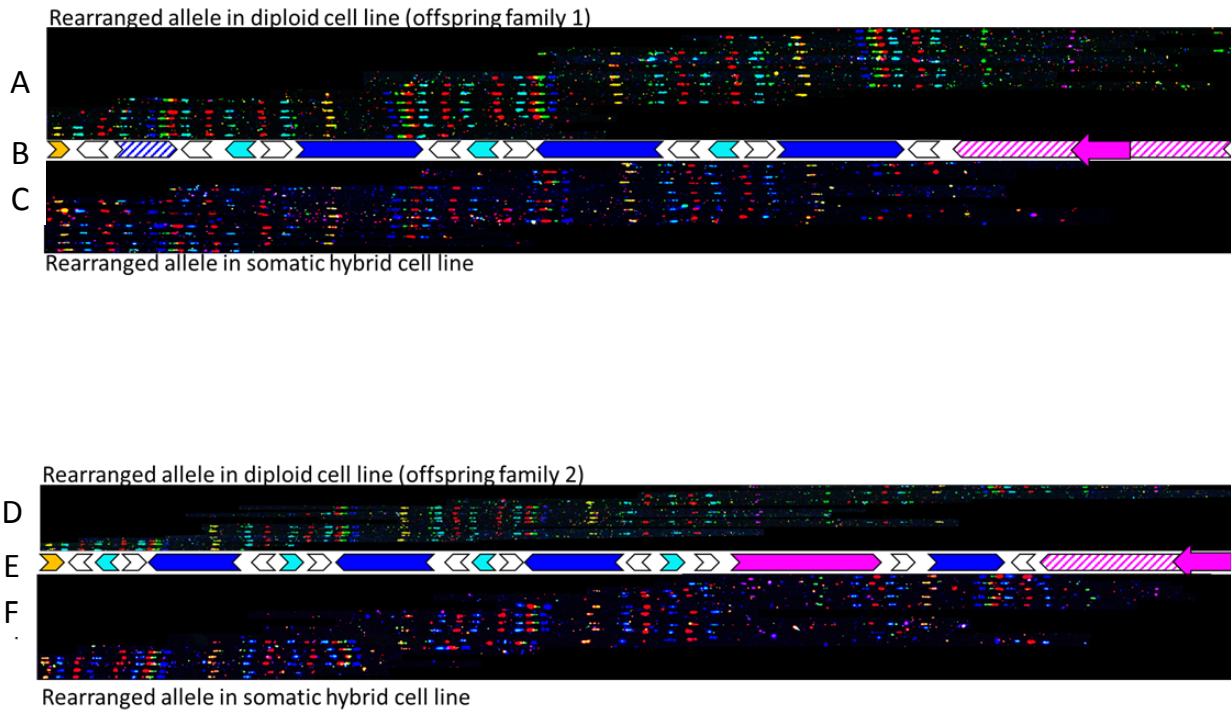

**Fig. S12.**

Comparison of the rearranged LCR22 allele isolated in hybrid cell lines to that assembled in the corresponding diploid EBV cell line. (A and D) Fiber FISH patterns assembled in the diploid cell lines for the individuals with the 22q11DS in Families 1 and 2. (B and E) Patterns translated to their duplicon representation, using colored arrows as defined in Fig. 1. (C and F) Matching (rearranged) alleles assembled in corresponding hybrid cell lines.
