# Supplementary material for: The 22q11 low copy repeats are characterized by unprecedented size and structural variability
Source: PubMed Central journal article supplement — Genome Res. 2019 Sep;29(9):1389–401. doi: 10.1101/gr.248682.119 (PMC6724673; doi:10.1101/gr.248682.119), 2019-09
Supplement: supp_gr.248682.119_Supplemental_TABLE_S2.pdf [file supp_gr.248682.119_Supplemental_TABLE_S2.pdf]

**Table S2.**

BAC probes, long range PCR product coordinates in hg38 and their respective fluorescent labels that were designed to constitute the fiber FISH pattern for the LCR22s

| Probe_ID    | Probe coordinates (hg38) | Color   | Probe size (basepairs) | Forward primer                 | Reverse primer                 |
|-------------|--------------------------|---------|------------------------|--------------------------------|--------------------------------|
| A1          | chr22:18838945-18844821  | blue    | 5877                   | CTTTCTAGATTGACCACTCAGGAGTTAC   | CTTAGGAGCTTTTCTTCTAGTTGCAGT    |
| A2          | chr22:18846775-18854471  | green   | 7697                   | GTCAAGACAACCTAAGAAGGTTTTCC     | TCTACTGAATCACTTGTCAAGAAGC      |
| A3          | chr22:18863891-18870589  | cyan    | 6699                   | GACCCGCTAACTCATTTTATACATC      | GTTTATTCCACCTGTCAGTCTCACT      |
| A4          | chr22:18926025-18934677  | green   | 8653                   | ATAAAGGTAGTTACCTGGTTCCAAGAC    | AGCCCTAAGGTTTCTTGTCTAGATTC     |
| A5          | chr22:18952693-18960789  | magenta | 8096                   | GGATCTACGGAGTCTTCTAAGAGATTT    | CATAATAGTTAGAACTGTCTCTCTGGGCTA |
| B1          | chr22:20313062-20319545  | yellow  | 6484                   | GTACAAGTATAGGGCTGTAGGTGCT      | AGTGTTCGGAAGAGGTCTCTAAGAT      |
| B2          | chr22:20339592-20344598  | red     | 5007                   | CTTTGGAACAAAGCCACAGTAGTAT      | AATGAACTTCCACAGTACCTTCTTG      |
| B3          | chr22:20369408-20379200  | yellow  | 9793                   | ATACCAAGAGAATCCCCTTACCAGT      | CTTTTGTGGCAGTAGTGTTCCTAT       |
| D1          | chr22:21057588-21062418  | blue    | 4831                   | GTGAGAGAGATTAGGATCCCTTTTCAT    | TTAATACCACTAGGCTCAACCCGTAT     |
| D2          | chr22:21115365-21122584  | red     | 7220                   | TAACTGTGAAGGATTCTTACTCTAGTGTCC | GATCATCTCTCTGCCAAAATAACAG      |
| D3          | chr22:21151184-21159924  | cyan    | 8741                   | AACAAGCTCTTGACATTCTCTGAGT      | AGCATTATTACTACTGCAGCTACCAC     |
| D5          | chr22:21486822-21489767  | magenta | 2946                   | GGTCAGGTACTTCTTATCTGAGAACAT    | CAAATAGATGGGAGTGTGTTTCTTC      |
| D6          | chr22:21557969-21561954  | green   | 3986                   | CACCATCCCAGTACATAATGACTTC      | ATTGGCACCATAGAGCAGTACTAAC      |
| D7          | chr22:21221650-21229324  | yellow  | 7675                   | GAGGCCTTAGCAGAAATAACAGAAG      | CAGTGCTTTACCACAGAGTGTTTTA      |
| CH17-320A22 | chr22:17943114-18171048  | green   | 227935                 | BAC                            |                                |
| CH17-203M7  | chr22:19078955-19323096  | red     | 244142                 | BAC                            |                                |
| CH17-289E17 | chr22:20073602-20301293  | green   | 227692                 | BAC                            |                                |
| CH17-131N14 | chr22:20398072-20629441  | blue    | 231370                 | BAC                            |                                |
| RP11-590C5  | chr22:20726003-20906345  | red     | 180343                 | BAC                            |                                |
| RP11-165F18 | chr22:20934046-21099834  | yellow  | 165789                 | BAC                            |                                |
| RP11-354K13 | chr22:21588266-21764059  | magenta | 175794                 | BAC                            |                                |
