# Supplementary material for: The 22q11 low copy repeats are characterized by unprecedented size and structural variability
Source: PubMed Central journal article supplement — Genome Res. 2019 Sep;29(9):1389–401. doi: 10.1101/gr.248682.119 (PMC6724673; doi:10.1101/gr.248682.119), 2019-09
Supplement: supp_gr.248682.119_Supplemental_TABLE_S3.pdf [file supp_gr.248682.119_Supplemental_TABLE_S3.pdf]

**Table S3**

Immortalized cell lines for which LCR22A was mapped

| sample# | cell line                           | ID         | family | relation (PO = parent of origin) | mapping              | assembled(non-transmitted) complete LCR22A alleles |
|---------|-------------------------------------|------------|--------|----------------------------------|----------------------|----------------------------------------------------|
| 1       | complete Hydatiform molar cell line | CHM1       | NA     | NA                               | fiber FISH + Bionano | 1                                                  |
| 2       | EBV                                 | GM12878    | NA     | HapMap                           | fiber FISH + Bionano | 2                                                  |
| 3       | EBV                                 | KD70002217 | 1      | mother                           | fiber FISH + Bionano | 2                                                  |
| 4       | EBV                                 | KD77577567 | 1      | father (PO)                      | fiber FISH + Bionano | 2                                                  |
| 5       | EBV                                 | KD8866372  | 1      | proband                          | fiber FISH + Bionano | NA                                                 |
| 6       | EBV                                 | KD61116500 | 2      | mother                           | fiber FISH + Bionano | 2                                                  |
| 7       | EBV                                 | KD61116503 | 2      | father (PO)                      | fiber FISH + Bionano | 2                                                  |
| 8       | EBV                                 | KD263193   | 2      | proband                          | fiber FISH + Bionano | NA                                                 |
| 9       | EBV                                 | KD1338446  | 3      | mother (PO)                      | fiber FISH           | 2                                                  |
| 10      | EBV                                 | KD79716312 | 3      | father                           | fiber FISH           | 2                                                  |
| 11      | EBV                                 | KD60426119 | 3      | proband                          | fiber FISH           | NA                                                 |
| 12      | EBV                                 | KD77164804 | 4      | mother (PO)                      | fiber FISH           | 2                                                  |
| 13      | EBV                                 | KD77226728 | 4      | father                           | fiber FISH           | 2                                                  |
| 14      | EBV                                 | KD71025464 | 4      | proband                          | fiber FISH           | NA                                                 |
| 15      | EBV                                 | KD477855   | 5      | mother (PO)                      | fiber FISH           | 2                                                  |
| 16      | EBV                                 | KD82436809 | 5      | father                           | fiber FISH           | 2                                                  |
| 17      | EBV                                 | KD1279982  | 5      | proband                          | fiber FISH           | NA                                                 |
| 18      | EBV                                 | KD147583   | 6      | mother                           | fiber FISH           | 2                                                  |
| 19      | EBV                                 | KD147582   | 6      | father (PO)                      | fiber FISH           | 2                                                  |
| 20      | EBV                                 | KD64650    | 6      | proband                          | fiber FISH           | NA                                                 |
| 21      | EBV                                 | BM1452.200 | 7      | mother                           | fiber FISH           | 2                                                  |
| 22      | EBV                                 | BM1452.100 | 7      | father (PO)                      | fiber FISH           | 2                                                  |
| 23      | EBV                                 | BM1452.001 | 7      | proband                          | fiber FISH           | NA                                                 |
| 24      | EBV                                 | BM1453.200 | 8      | mother (PO)                      | fiber FISH           | 2                                                  |
| 25      | EBV                                 | BM1453.100 | 8      | father                           | fiber FISH           | 2                                                  |
| 26      | EBV                                 | BM1453.001 | 8      | proband                          | fiber FISH           | NA                                                 |
| 27      | EBV                                 | KD72344971 | NA     | proband                          | fiber FISH           | 1                                                  |
| 28      | EBV                                 | KD73666398 | NA     | proband                          | fiber FISH           | 1                                                  |
| 29      | EBV                                 | KD76172253 | NA     | proband                          | fiber FISH           | 1                                                  |
| 30      | EBV                                 | KD74812843 | NA     | proband                          | fiber FISH           | 1                                                  |
| 31      | EBV                                 | KD79537395 | NA     | proband                          | fiber FISH           | 1                                                  |
| 32      | EBV                                 | KD83148403 | NA     | parent                           | fiber FISH           | 2                                                  |
| 33      | EBV                                 | KD77657625 | NA     | parent                           | fiber FISH           | 2                                                  |
| 34      | Fibroblast                          | AG 06939A  | NA     | NA                               | fiber FISH           | 2                                                  |
