# Supplementary material for: The 22q11 low copy repeats are characterized by unprecedented size and structural variability
Source: HighWire-hosted journal article supplement (doi:10.1101/gr.248682.119), 2019-09-01
Supplement: Supplemental_Methods_.docx [file Supplemental_Methods_.docx]

**Supplementary Methods**

***Construction and screening of hybrid cell lines***

Two individuals with the 22q11DS were randomly selected to produce stable, chromosome 22 haploid cell hybrids in a Wg3h Chinese hamster background. The latter is HPRT-deficient, allowing selection of fused cell colonies. Briefly, human EBV cells were fused with host cells in the presence of PEG and grown under selective HAT medium (Choy et al. 1982). Cell colonies were screened by PCR and interphase FISH to select only those containing a del (22)(q11.21).

***In silico* characterization of repeat subunits in LCR22s**

The consensus of subunit families with at least one subunit between chr22:18,000,000-25,500,000 were created with Clustalx 2.1(Larkin et al. 2007) and the EMBOSS v6.5.7(Rice et al. 2000) cons module. BEDTools was also used to subtract the subunits locations from the original UCSC region chr22:18,000,000-25,500,000 segmental duplication positions. The sequences of these “low percent identity” subunits were then retrieved using the UCSC Table Browser. The low percent identity sequences and subunit family consensus sequences were then merged into a final FASTA file, repeat masked (Smit et al. 1996, 2013), and sequences composed of >95% N's removed.

***Long range PCR Probe design***

14 repeat subunits were selected based on 1) their size being >2 kb, which is needed to provide a visible probe signal, and 2) copy number ranging between 2-10 copies on chromosome 22q11.21 which ensured that probes were visually countable and evenly spread over the LCR22s. Fourteen fluorescent probes were designed such that each probe targeted one subunit, which would also hybridize at the position of every paralogous subunit in that family. All those paralogous subunit positions were evaluated by BLAT alignment of probe sequences in the UCSC Genome Browser. Pattern colors were designed so that no two adjacent subunits in hg38 would produce the same fluorescent signal, in order to guarantee correct identification.

***DNA combing, FISH, and fiber pattern assembly***

Cultured EBV cells were embedded in an agarose plug and subsequently lysed and washed. DNA was extracted for. Next, the agarose was dissolved and long DNA fragments were resuspended. Using an automated combing system, DNA fibers were consistently stretched on a coated glass coverslip by the receding meniscus method. YOYO-1 staining and scanning allowed visualization and evaluation of DNA fibers at this step.

**Bionano genome mapping and assembly**

***High-molecular-weight DNA extraction***

High molecular-weight DNA for genome mapping was obtained from whole blood. White blood cells were isolated from whole blood samples using a ficoll-paque plus (GE healthcare) gradient. The buffy coat layer was transferred to a new tube and washed twice with Hank’s balanced salt solution (HBSS, Gibco Life Technologies). A small aliquot was removed to obtain a cell count before the second wash. The remaining cells were resuspended in RPMI (Gibco Life Technologies) containing 10% fetal bovine serum (Sigma-Aldrich) and 10% DMSO (Sigma-Aldrich). Cells were embedded in thin low-melting-point agarose plugs (CHEF Genomic DNA Plug Kit, Bio-Rad). Subsequent handling of the DNA followed protocols from Bionano Genomics using the Bionano Prep Blood and Cell Culture DNA Isolation Kit. Briefly, the agarose plugs were incubated with Proteinase K at 50°C overnight. The plugs were washed and then solubilized with GELase (Epicentre). The purified DNA was subjected to 45min of drop-dialysis, allowed to homogenize at room temperature overnight, and then quantified using a Qubit dsDNA BR Assay Kit (Molecular Probes/Life Technologies). DNA quality was assessed using pulsed-field gel electrophoresis.

***DNA labeling for Bionano genome mapping***

The DNA was labeled using the Bionano Prep Early Access Direct Labeling and Staining (DLS) Kit (Bionano Genomics). DLS labels DNA using an epigenetic mark rather than by introducing single-strand nicks. Therefore, unlike the previously used enzyme Nt.BspQI, it does not create fragile sites that lead to consistent DNA breakage. 750 ng of purified genomic DNA was labeled by incubating with DL-Green dye and DLE-1 Enzyme in DLE-1 Buffer for 2 hr at 37°C, followed by heat-inactivation of the enzyme for 20 min at 70°C. The labeled DNA was treated with Proteinase K at 50°C for 1 hr, and excess DL-Green dye was removed by membrane adsorption. The DNA was stored at 4°C overnight to facilitate DNA homogenization and then quantified using a Qubit dsDNA HS Assay Kit (Molecular Probes/Life Technologies). The labeled DNA was stained with an intercalating dye and left to stand at room temperature for at least 2 hrs.

***Bionano data collection and assembly***

The DNA was loaded onto the Bionano Genomics Saphyr Chip and linearized and visualized using the Saphyr system. The DNA backbone length and locations of fluorescent labels along each molecule were detected using Saphyr’s image detection software. Single-molecule maps were assembled de novo into genome maps using Bionano Solve with the default settings.

***Detection of structural variation within LCR22s***

Assembled contigs mapping to LCR22s were realigned to chromosome 22 using RefAligner from Bionano Solve 3.1 with the following parameters: -res 2.9 -FP 0.6 -FN 0.06 -sf 0.20 -sd 0.0 -sr 0.01 -extend 1 -outlier 1e-14 -endoutlier 1e-13 -PVendoutlier -deltaX 12 -deltaY 12 -xmapchim 12 5000 -nosplit 0 -biaswt 0 -T 1e-12 -S -1000 -PVres 2 -rres 0.9 -MaxSE 0.5 -MinSF 0.15 -HSDrange 1.0 -outlierBC -outlierLambda 20.0 -outlierType1 0 -xmapUnique 12 -AlignRes 2. -outlierExtend 12 24 -Kmax 12 -resEstimate -M 1. The resulting alignments were visualized in OMView from the OMTools package (Leung et al. 2017)

***LCR22 haplotype identification from Bionano data***

For each grouped set of LCR22 configurations, single molecules from each sample were used to determine which configuration(s) the sample contained as follows: 1) All of the single molecules corresponding to the region of interest were obtained from the standard Bionano de novo genome assembly pipeline using OMGenSV’s get_local_molecules.py script. 2) The local molecules were re-aligned to a CMAP file containing each configuration in the group using OMGenSV.py with default settings. The script processed the resulting alignment files in the following ways: First, the top two alignments for each molecule were compared to one another; if they received the same confidence or score, they were discarded. Otherwise, the best hit for each molecule was evaluated to see whether its alignment spanned the entire “critical region.” These regions were defined as those that were unique to the target configuration when compared to other configurations in the same group, as well as being anchored in the flanking area(s) by at least four labels or 40 kb, whichever was longer. Due to the inherent noise of single molecules, indels were permitted in the alignment overlapping the CR as long as the size change due to the indel was smaller than 50 kb. 3) Molecule alignments were manually evaluated if a configuration for a given sample was supported by only one or two molecules, if the minor configuration had no more than 25% the number of supporting molecules as the major configuration, or if a given sample was assigned more than two configurations. For these flagged cases, the alignment between the molecules and configurations were manually inspected in OMTools OMView.

***LCR22 haplotype reconstruction in trios***

For this analysis, every copy of SD22-6,4,6 (SD22-4 flanked on both ends by inward-facing copies of SD22-6) was assigned a genotype on the basis of five DLS label sites that were observed to be polymorphic between copies (**Fig. S10**). These genotypes were then used to tile the local configurations into full haplotypes on the basis of overlapping SD22-4 duplicons with identical genotypes, with the goal of reconstructing the end-to-end LCR22A and LCR22D haplotypes as well as the deletion haplotype in probands

**References**

Choy WN, Gopalakrishnan T V., Littlefield JW. 1982. Techniques for Using HAT Selection in Somatic Cell Genetics. In *Techniques in Somatic Cell Genetics*, pp. 11–21, Springer US, Boston, MA.

Larkin MA, Blackshields G, Brown NP, Chenna R, McGettigan PA, McWilliam H, Valentin F, Wallace IM, Wilm A, Lopez R, et al. 2007. Clustal W and Clustal X version 2.0. *Bioinformatics* **23**: 2947–8.

Leung AK-Y, Jin N, Yip KY, Chan T-F. 2017. OMTools: a software package for visualizing and processing optical mapping data. *Bioinformatics* **33**: 2933–2935.

Rice P, Longden I, Bleasby A. 2000. EMBOSS: the European Molecular Biology Open Software Suite. *Trends Genet* **16**: 276–7.

Smit A, Hubley R, Green P. 1996. RepeatMasker Open-3.0. *RepeatMasker Open-30* www.repeatmasker.org.

Smit A, Hubley R, Green P. 2013. RepeatMasker Open-4.0. 2013-2015 . *http://www.repeatmasker.org*.
