# Supplementary material for: The 22q11 low copy repeats are characterized by unprecedented size and structural variability
Source: HighWire-hosted journal article supplement (doi:10.1101/gr.248682.119), 2019-09-01
Supplement: Supplemental_STR_DATA_FAMILIES.zip [file FAMILY 1.docx]

FAMILY 1


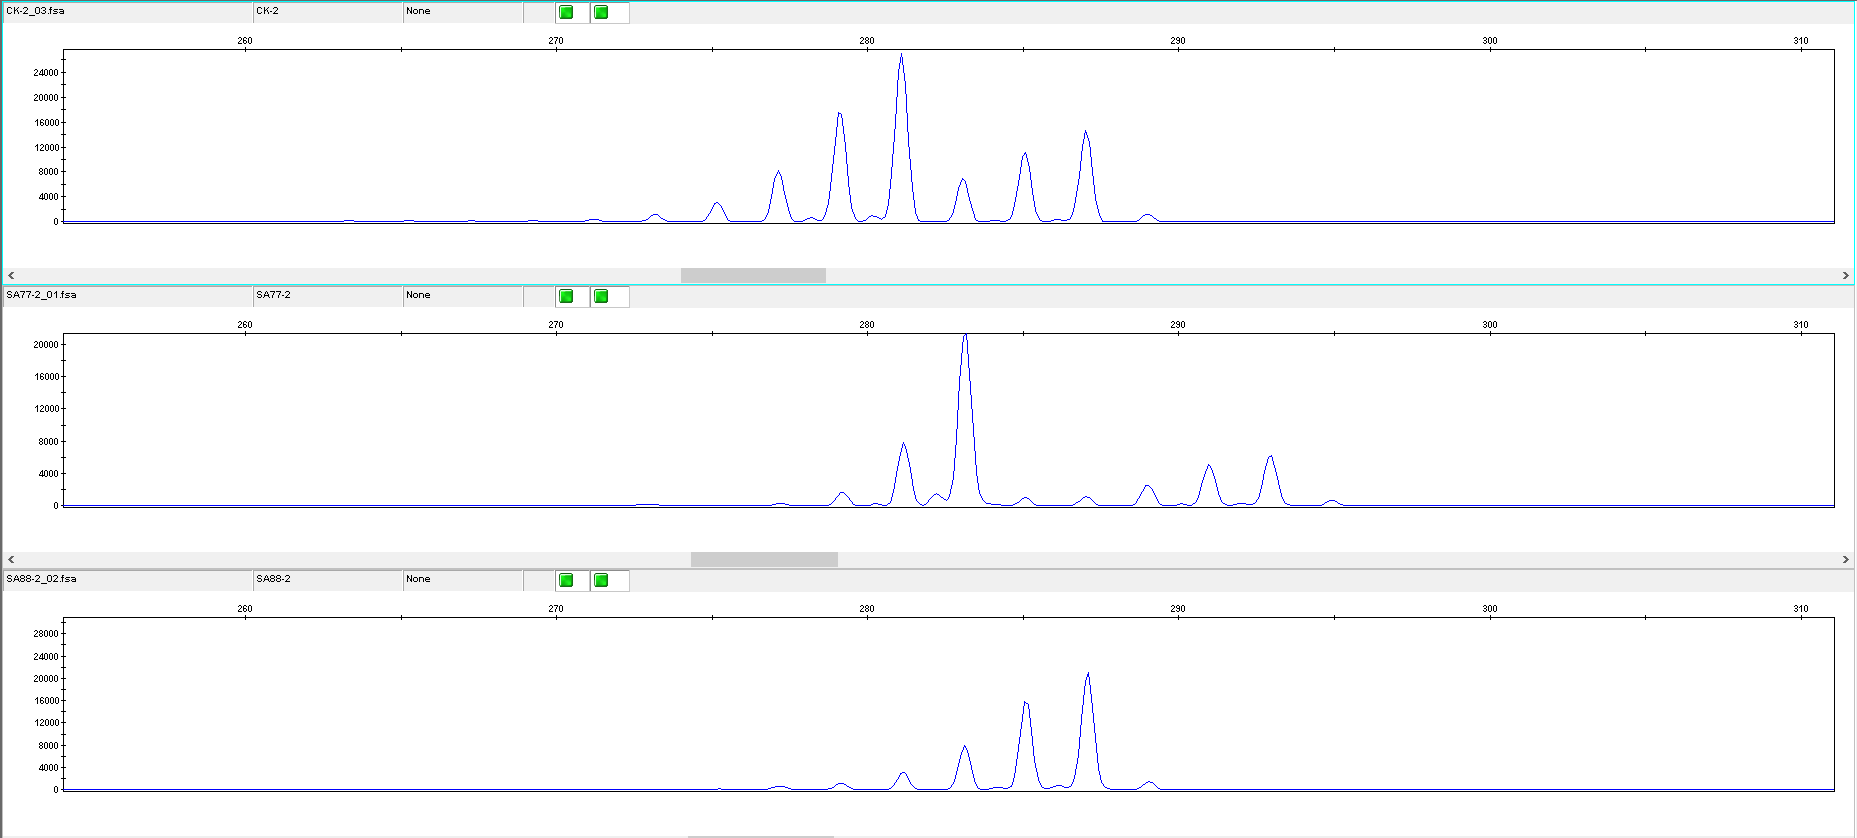


Father

Mother

Proband


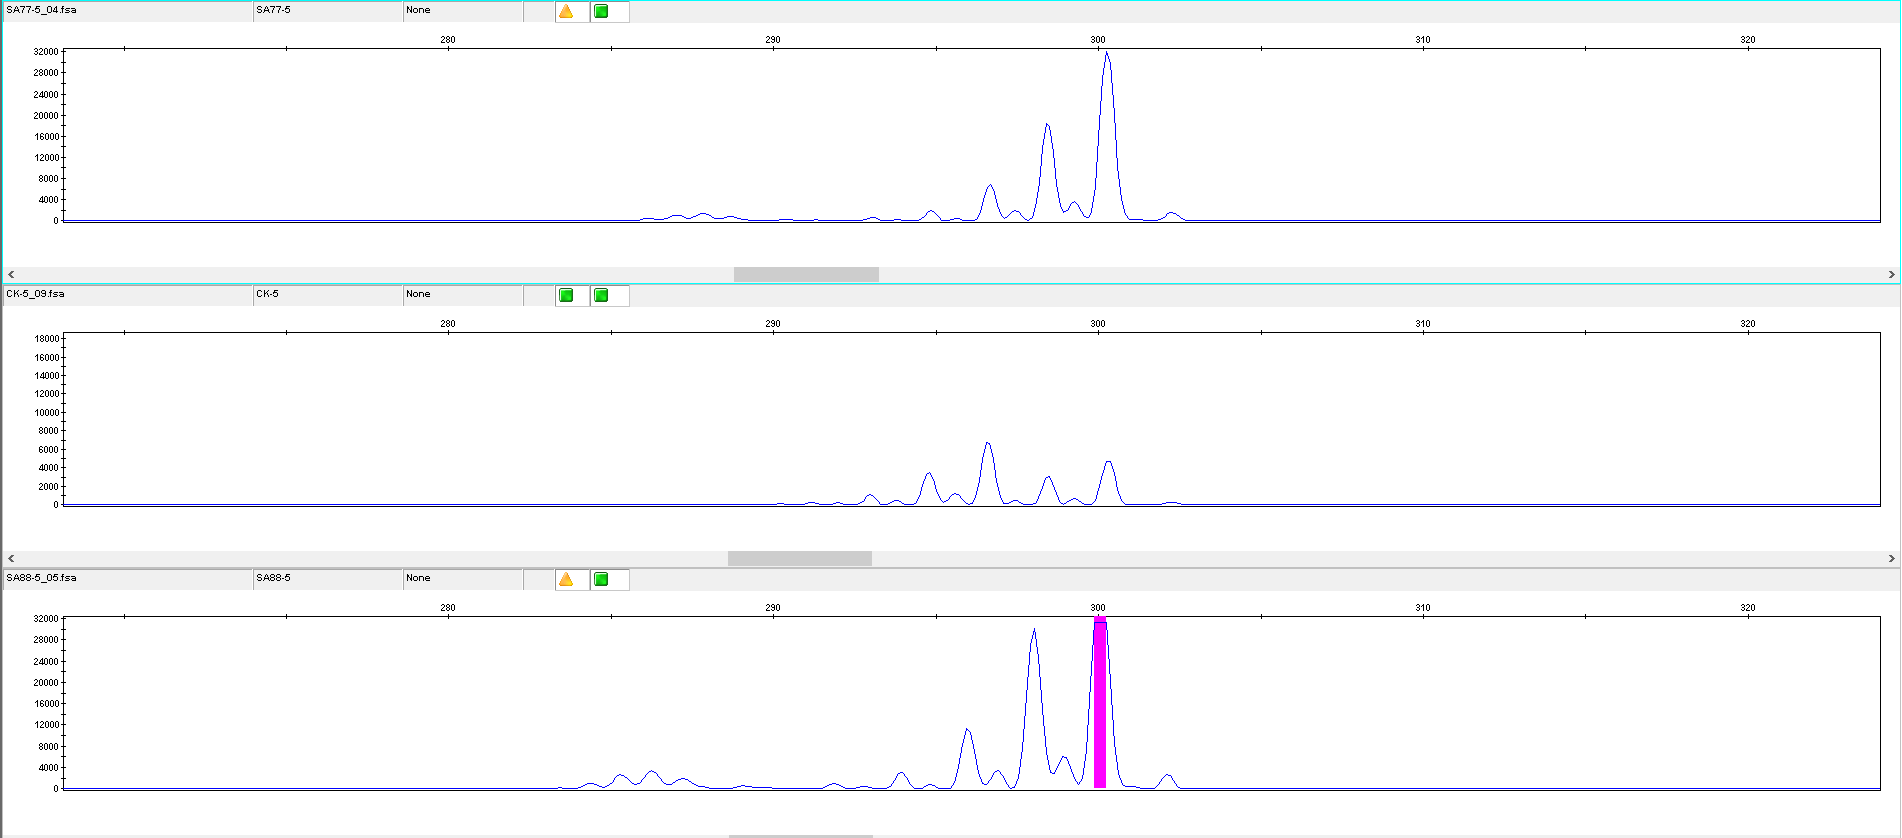


Mother

Father

Proband


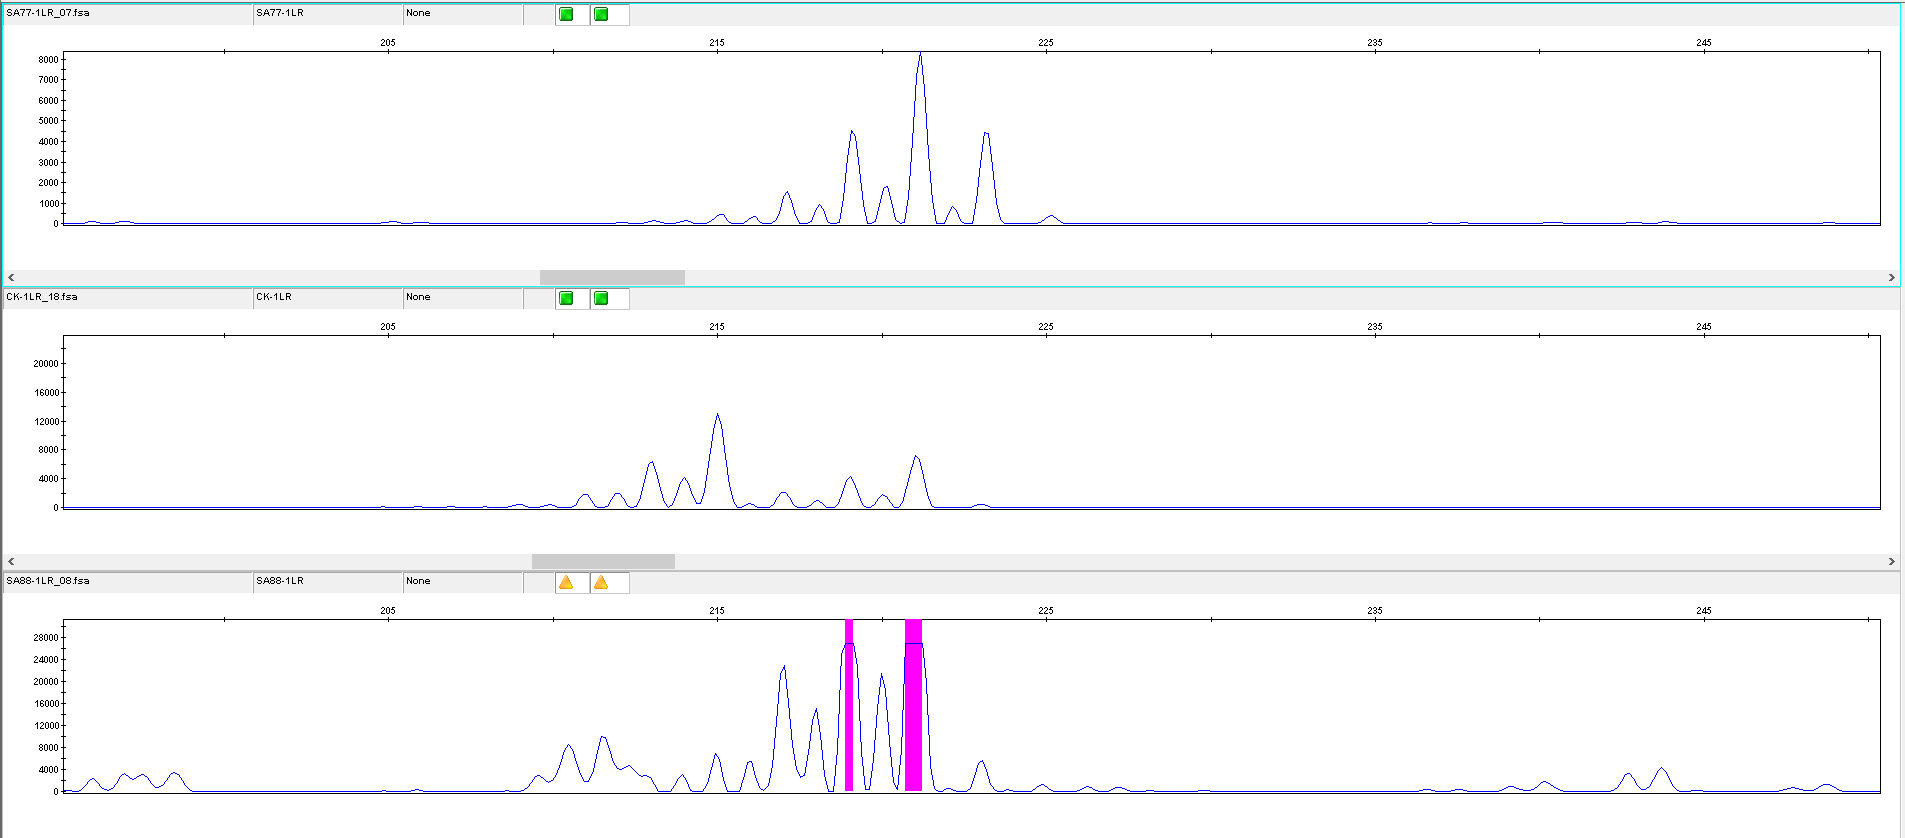


Mother

Father

Proband


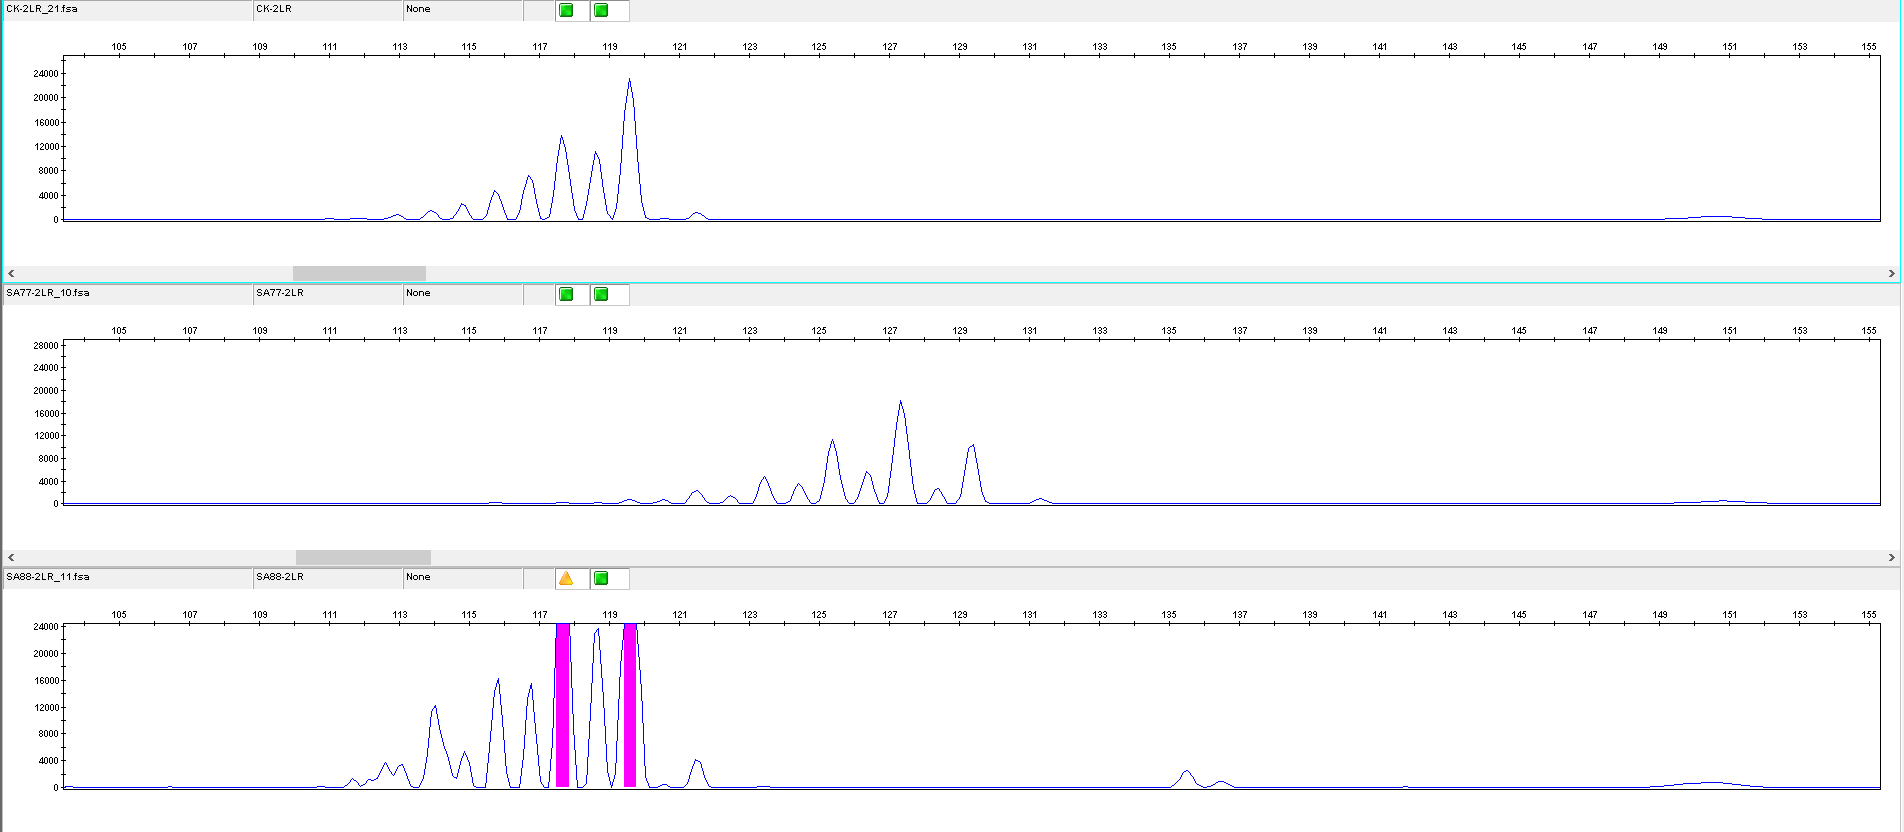


Proband

Father

Mother


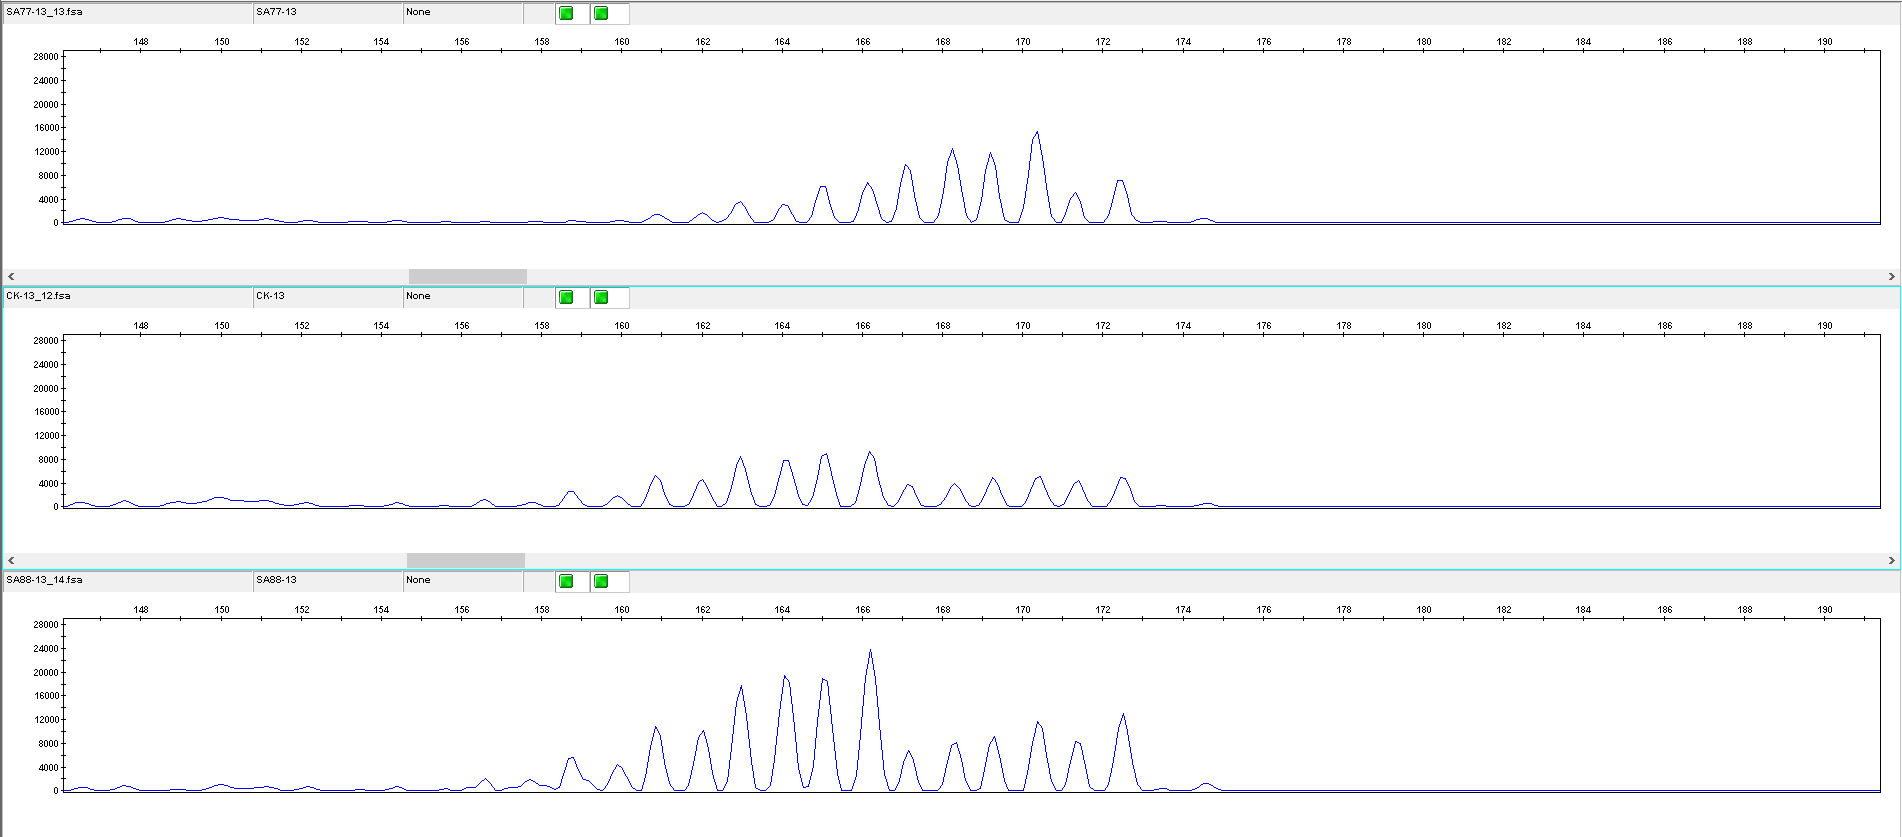


Mother

Father

Proband


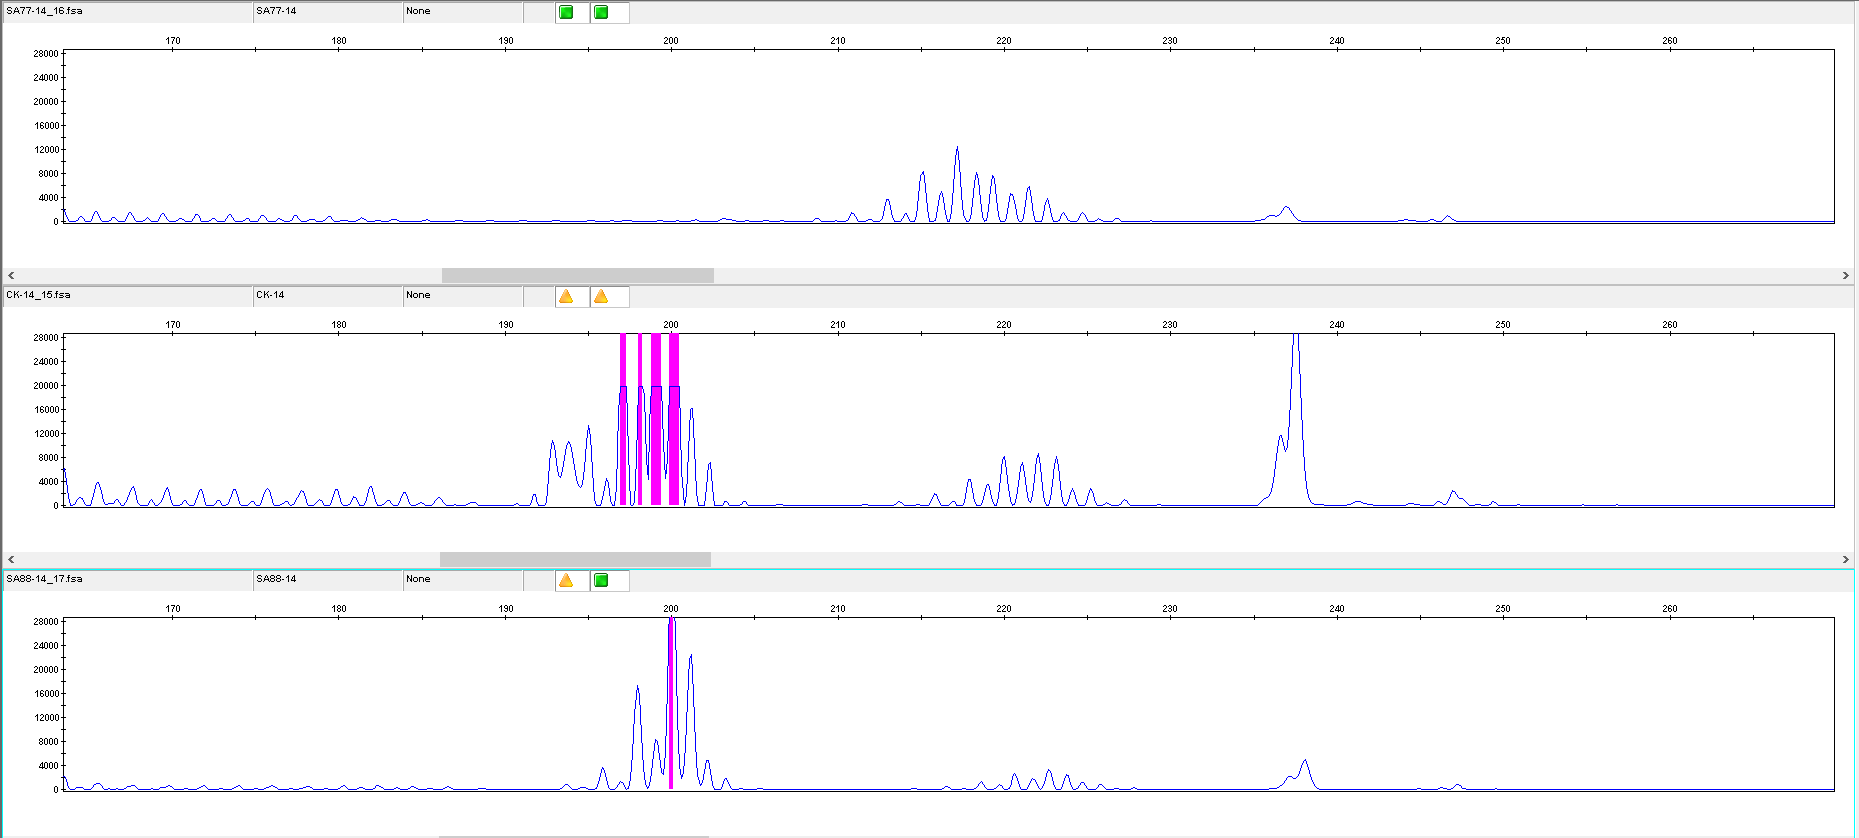


Mother

Father

Proband
