# Supplementary material for: The 22q11 low copy repeats are characterized by unprecedented size and structural variability
Source: HighWire-hosted journal article supplement (doi:10.1101/gr.248682.119), 2019-09-01
Supplement: Supplemental_STR_DATA_FAMILIES.zip [file Family 5.docx]

Family 5


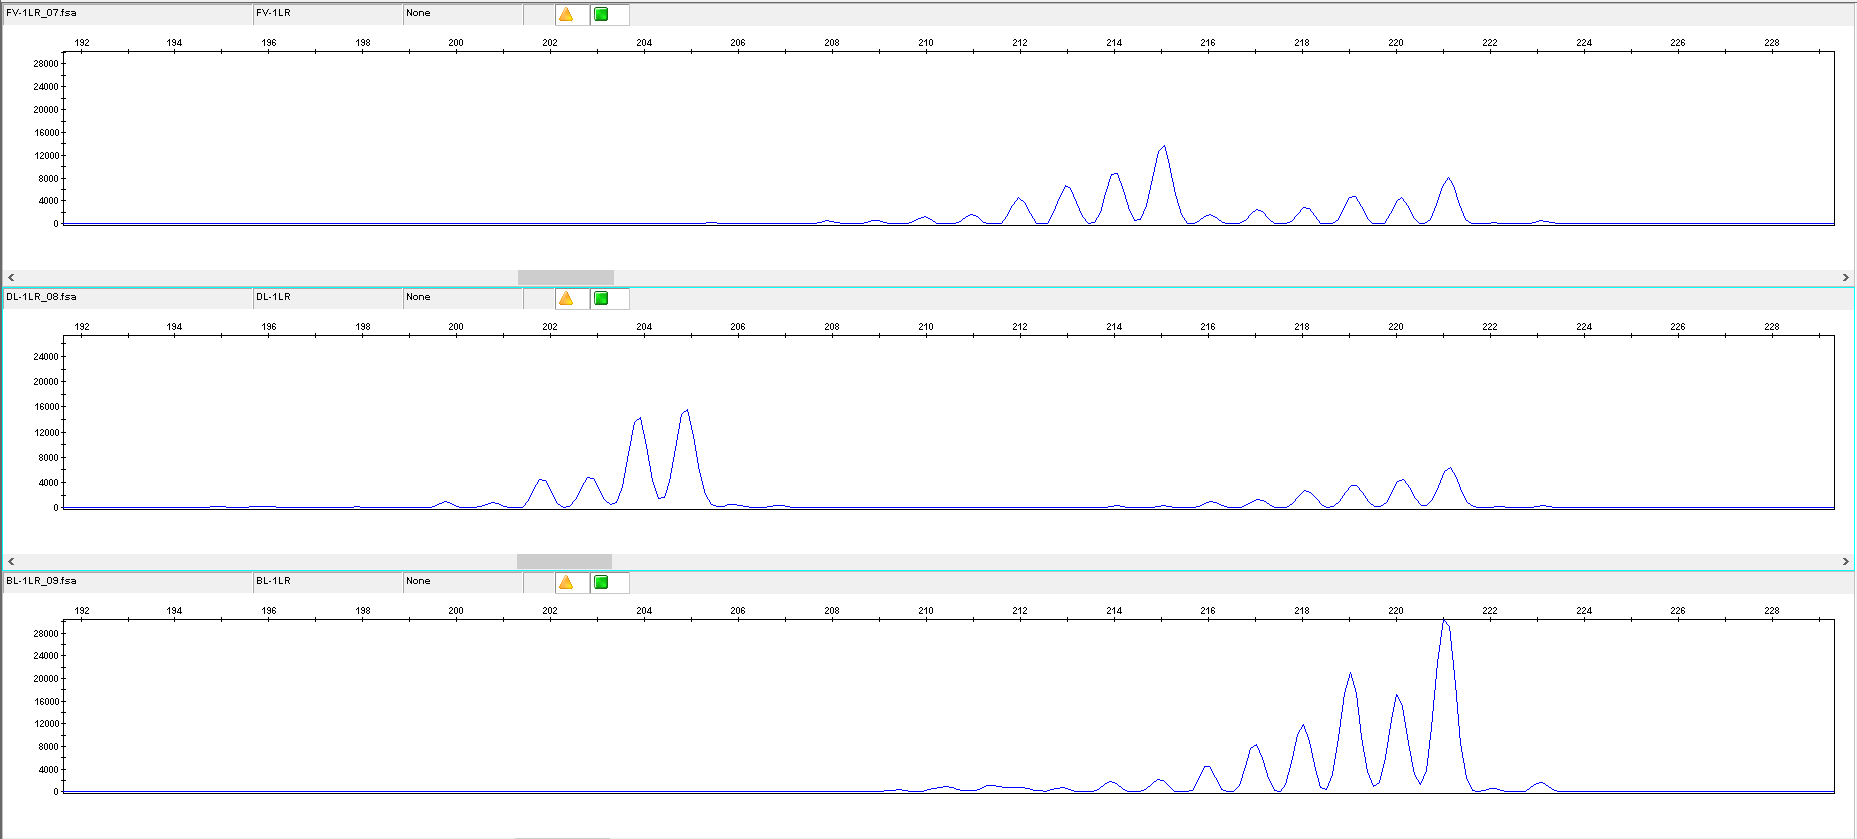


Proband

Father

Mother


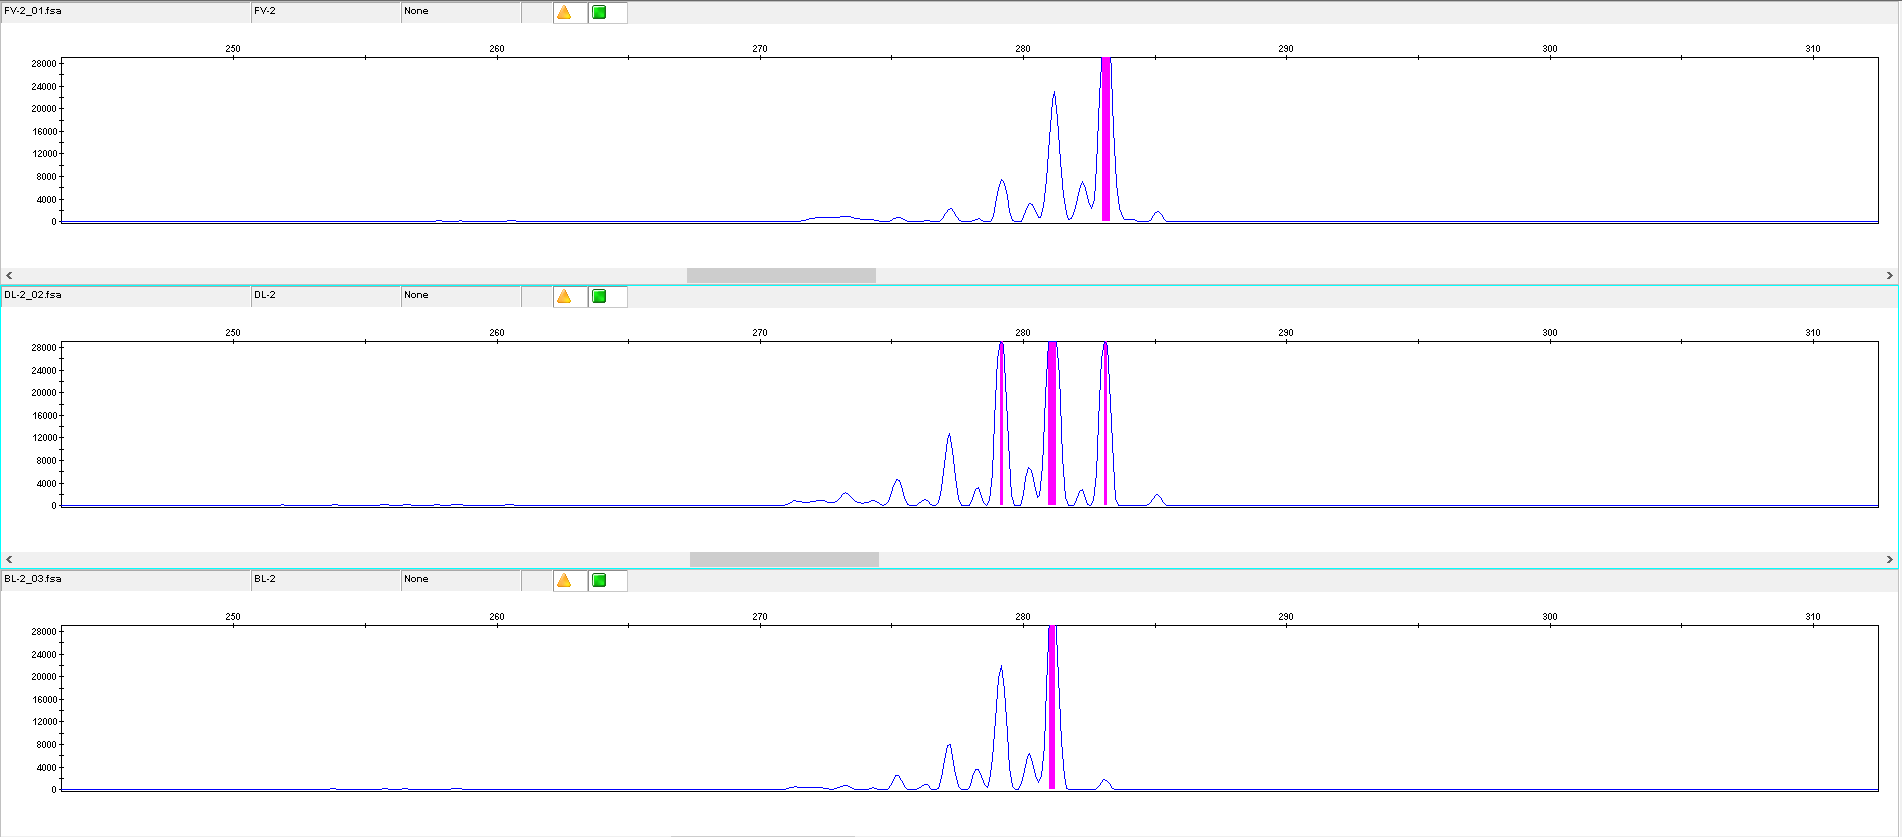


Proband

Father

Mother


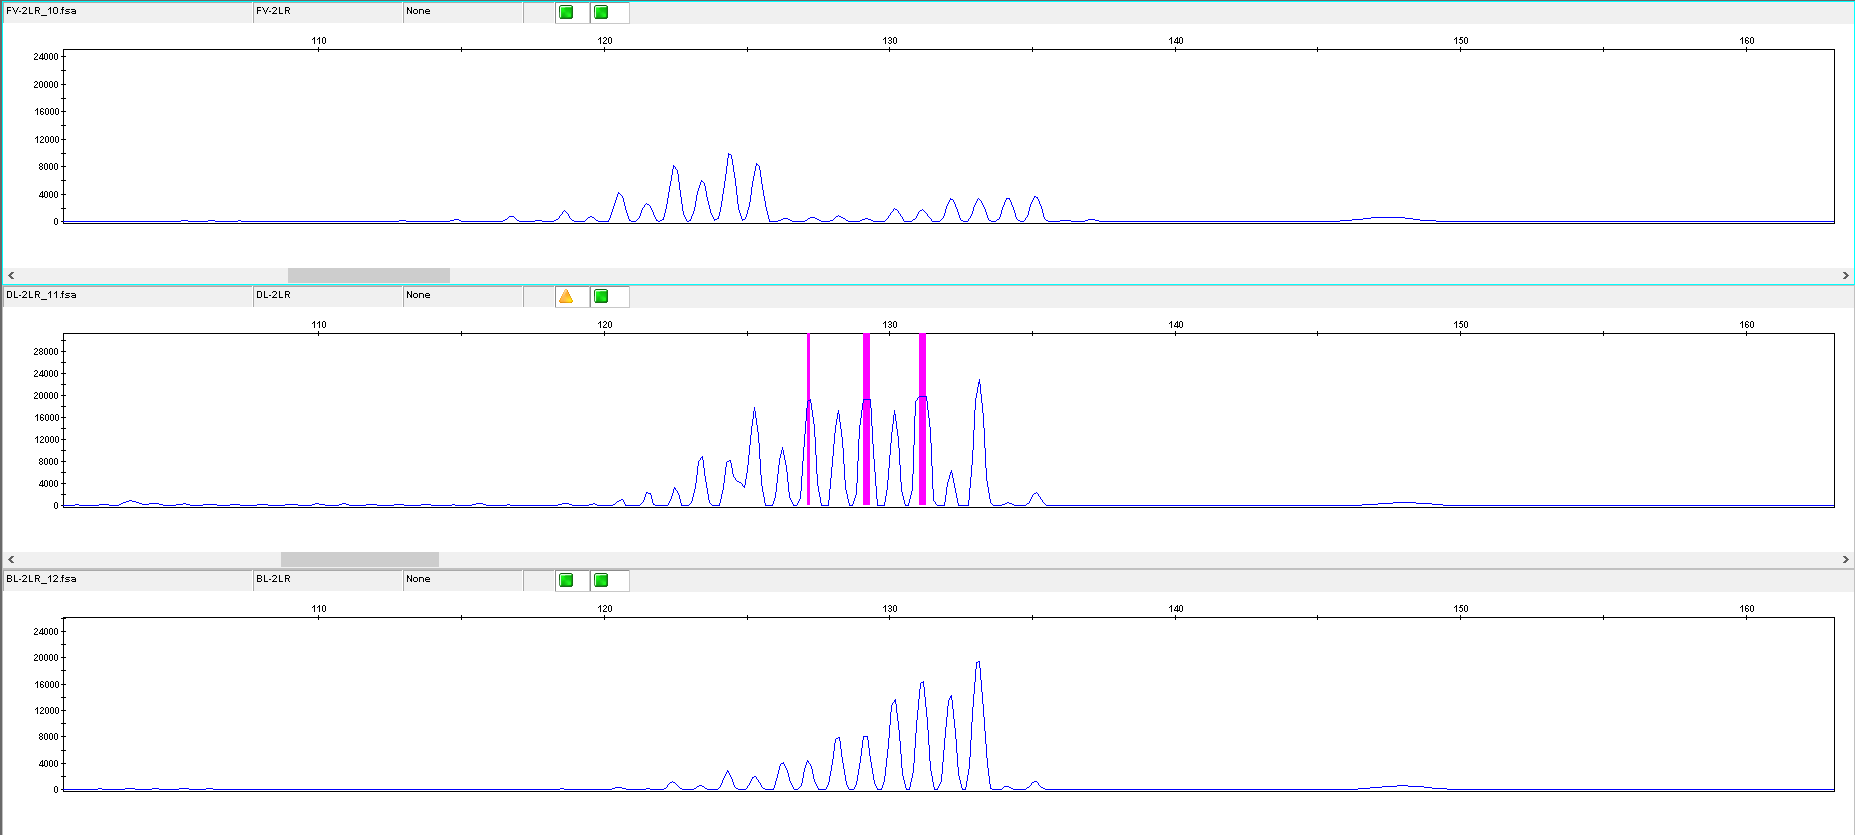


Proband

Father

Mother


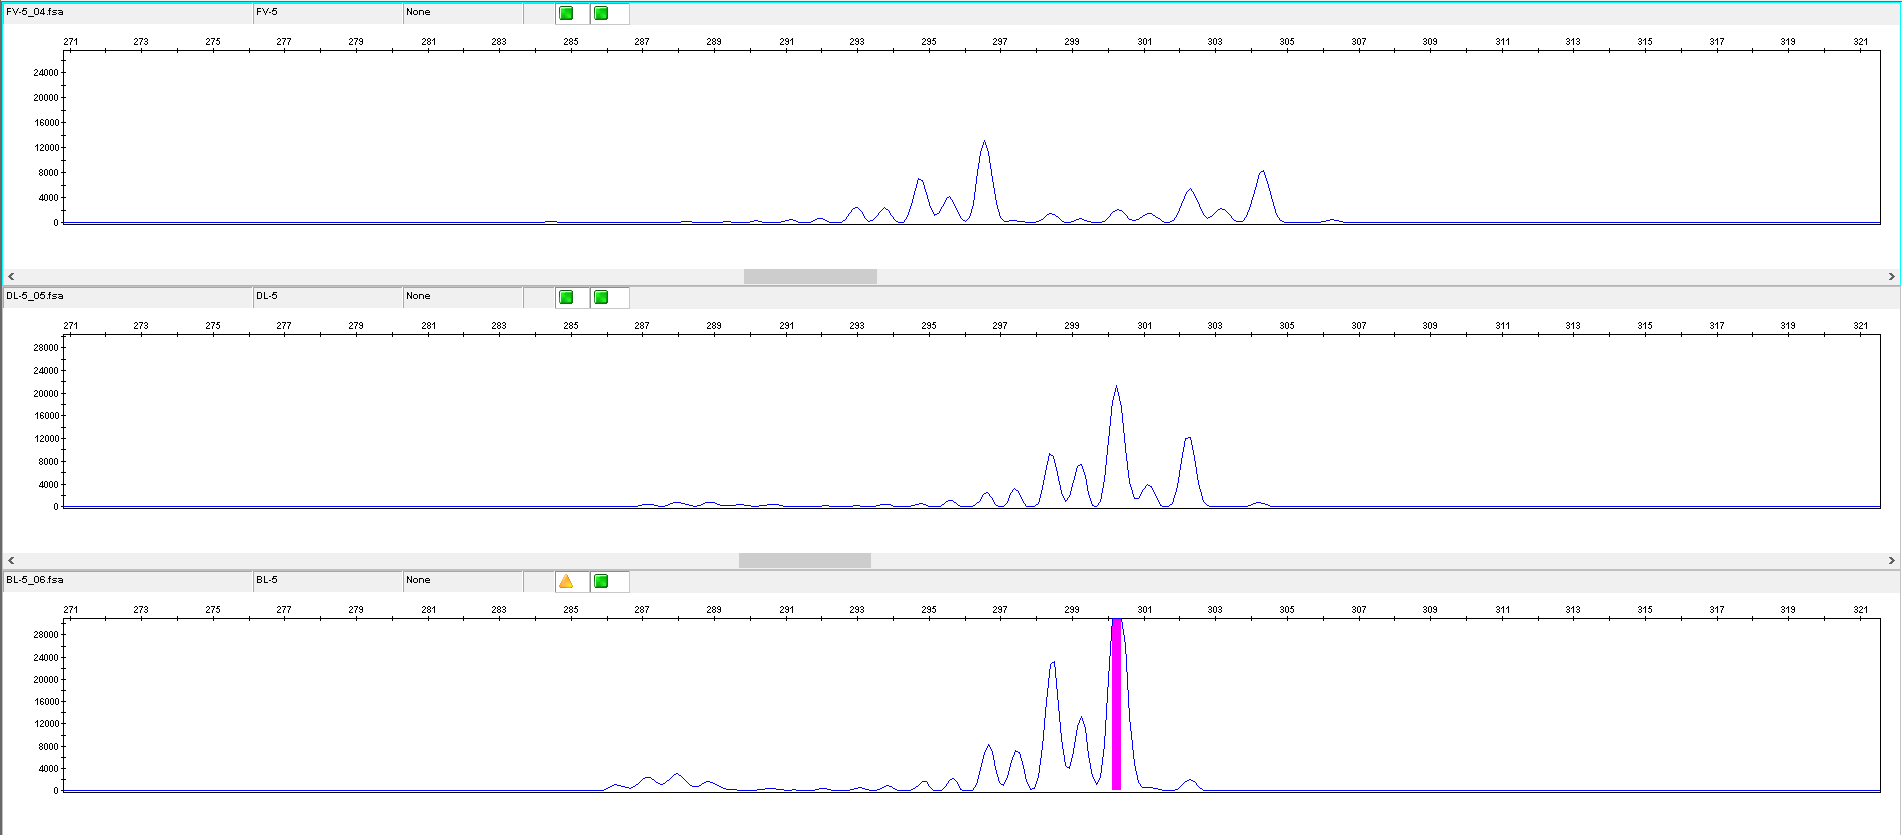


Mother

Father

Proband


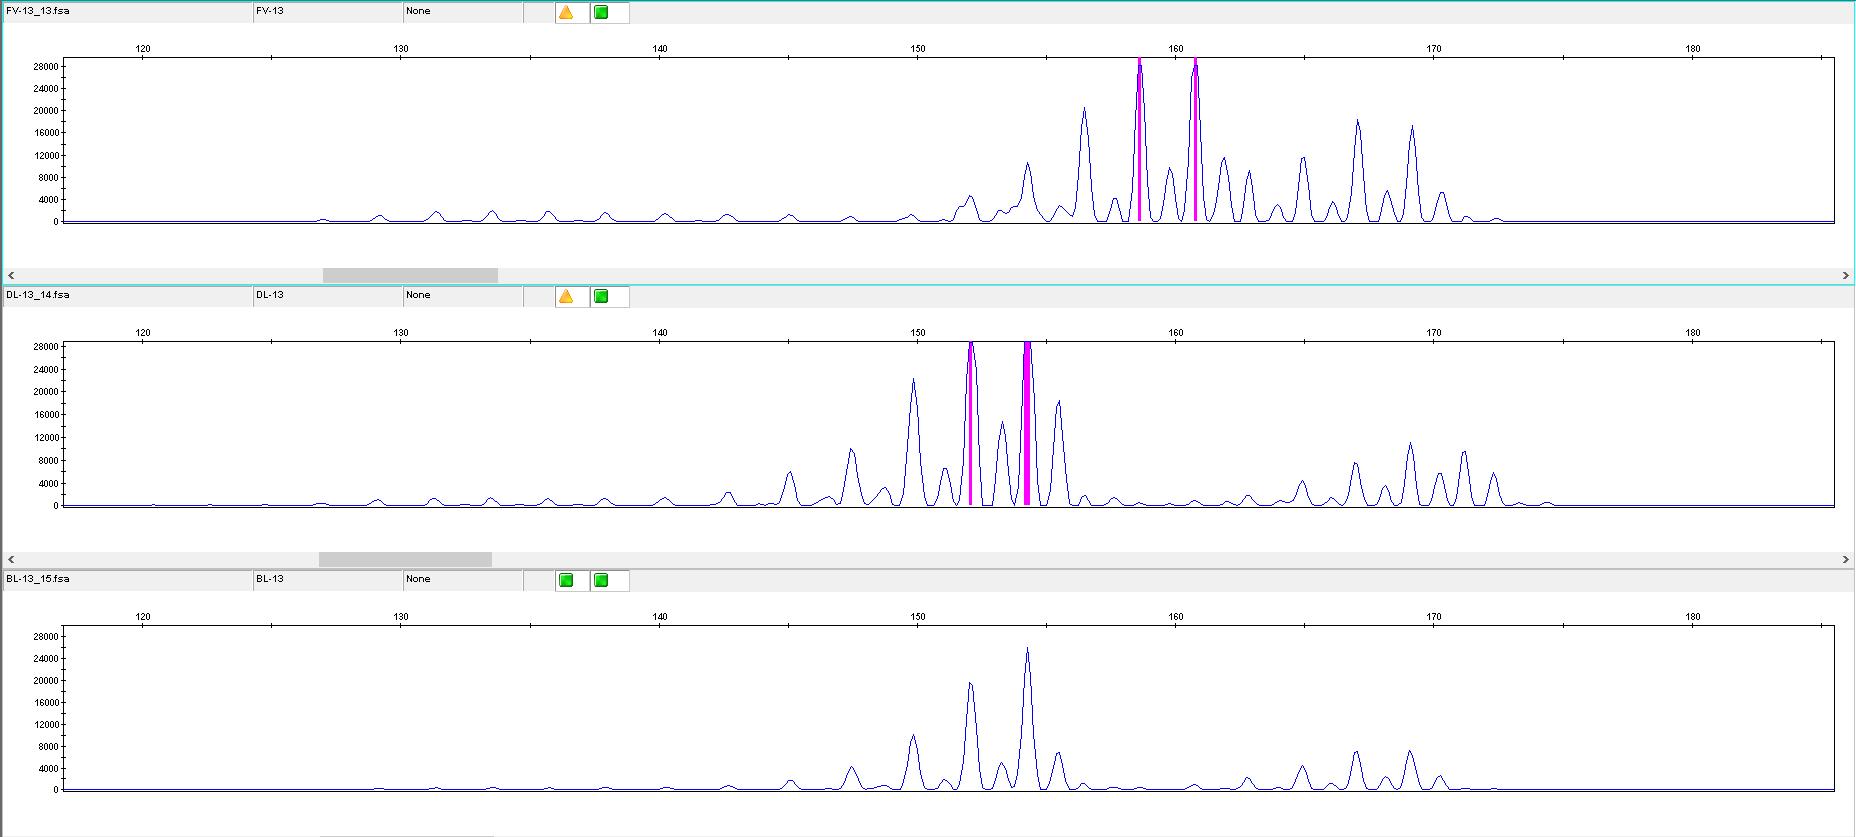


Proband

Father

Mother


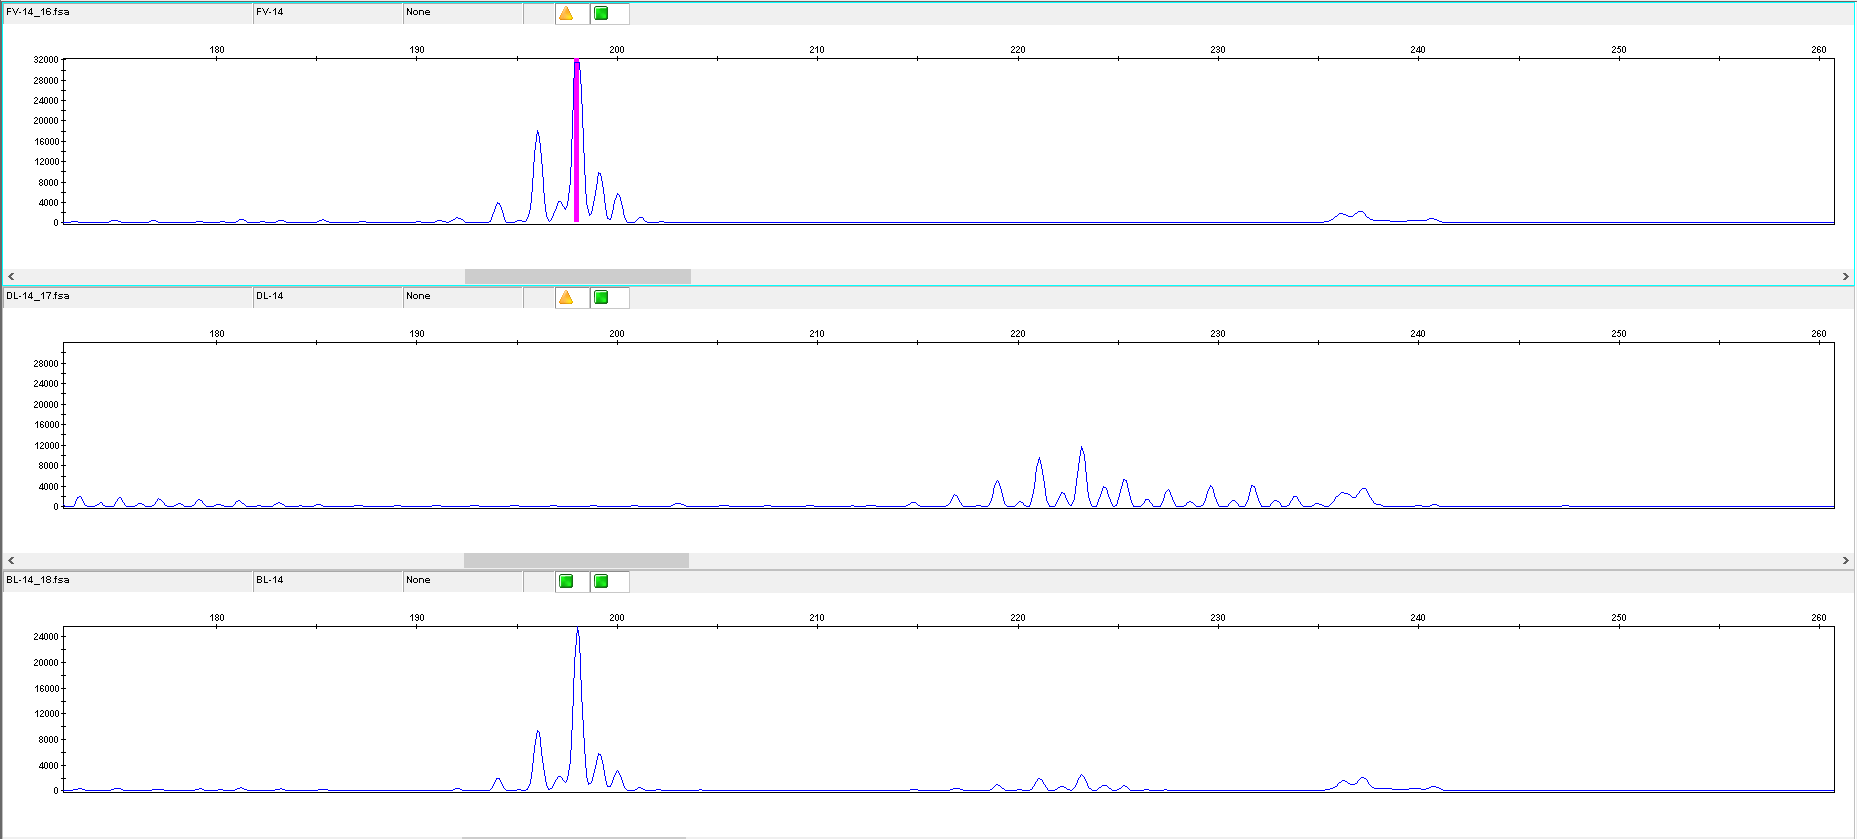


Mother

Father

Proband
